# Supplementary material for: Empirical assessment of sequencing errors for high throughput pyrosequencing data
Source: PubMed Central journal article supplement (PMC3852801; doi:10.1186/1756-0500-6-25), 2013-01-22

## newbler Matches

| HP base \ HP length | 1        | 2       | 3       | 4      | 5      | 6      | 7     | 8    | 9   | 10 | 11 | 12 | 13 | 14 | 15 | 16 | 17 | 18 | 19 | 20 | 21 | 22 | 23 | 24 |
|---------------------|----------|---------|---------|--------|--------|--------|-------|------|-----|----|----|----|----|----|----|----|----|----|----|----|----|----|----|----|
| A                   | 10112299 | 3780060 | 1394445 | 591882 | 250066 | 94484  | 27007 | 4569 | 498 | 61 | 10 | 9  | 10 | 4  | 3  | 7  | 1  | 2  | 0  | 1  | 0  | 0  | 0  | 1  |
| C                   | 9275676  | 1932907 | 270496  | 54226  | 8510   | 1239   | 175   | 6    | 0   | 0  | 0  | 0  | 0  | 0  | 0  | 0  | 0  | 0  | 0  | 0  | 0  | 0  | 0  | NA |
| G                   | 9325002  | 1918715 | 273077  | 51062  | 7796   | 1026   | 115   | 10   | 0   | 0  | 0  | 0  | 0  | 0  | 0  | 0  | 0  | 0  | 0  | 0  | 0  | 0  | 0  | NA |
| T                   | 10114600 | 3747686 | 1369516 | 584450 | 260939 | 101704 | 33958 | 6960 | 802 | 88 | 37 | 18 | 21 | 11 | 4  | 2  | 4  | 1  | 0  | 2  | 0  | 0  | 0  | NA |

Total HP matches: 55596277

Total match positions: 80998946

## newbler Substitutions

|   | A               | C                | G                | T                |
|---|-----------------|------------------|------------------|------------------|
| A | 0 ( 0 %)        | 74588 ( 11.2 %)  | 63823 ( 9.58 %)  | 92787 ( 13.93 %) |
| C | 26505 ( 3.98 %) | 0 ( 0 %)         | 49970 ( 7.5 %)   | 41064 ( 6.17 %)  |
| G | 23442 ( 3.52 %) | 48670 ( 7.31 %)  | 0 ( 0 %)         | 51326 ( 7.71 %)  |
| T | 53587 ( 8.05 %) | 72148 ( 10.83 %) | 68059 ( 10.22 %) | 0 ( 0 %)         |

Total substitutions: 665969

## newbler Insertion

### Insertion per context

Insertion: number of gaps per context

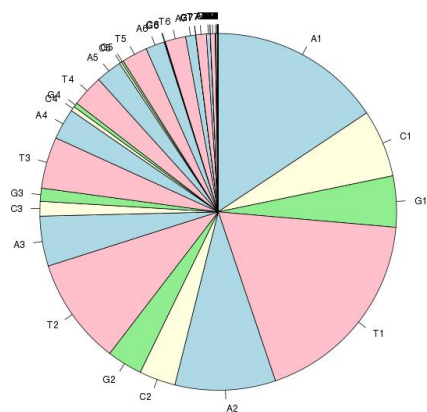

Total: 389063

### Insertion per context

Insertion: percentage of gaps per context

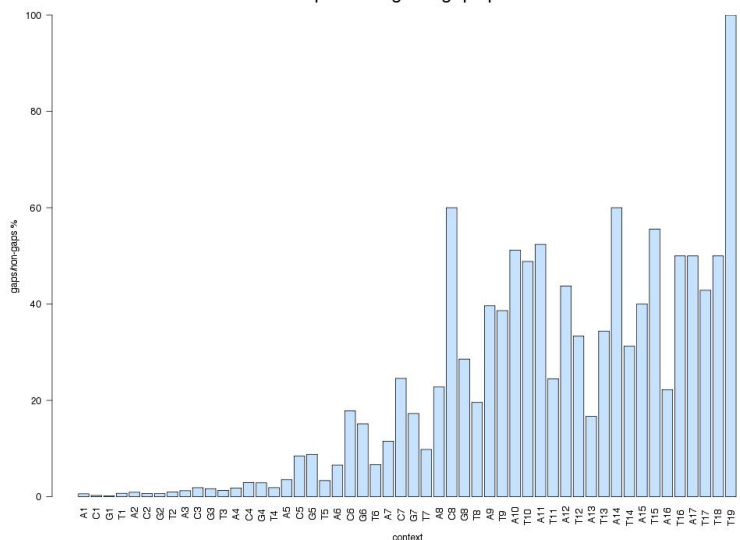

| Context | #Data  | Gap lengths                                      | Zipfian fit                                                                                                                                | Geom fit                                                                                                           |
|---------|--------|--------------------------------------------------|--------------------------------------------------------------------------------------------------------------------------------------------|--------------------------------------------------------------------------------------------------------------------|
| *       | 389077 | <p>Insertion error gap lengths (context=any)</p> | <p>s = 6.51939809057985<br/> <math>X^2 = 877.746274929354</math><br/>                     p-value = <math>3.44585223136766e-180</math></p> | <p>beta = 0.0129859257831130<br/> <math>X^2 = 35004614722711199744</math><br/>                     p-value = 0</p> |
| A1      | 60867  | <p>Insertion error gap lengths (context=A1)</p>  | INVALID/ERROR                                                                                                                              | INVALID/ERROR                                                                                                      |

|    |       |                                                                                                                                                                |               |               |
|----|-------|----------------------------------------------------------------------------------------------------------------------------------------------------------------|---------------|---------------|
| C1 | 23769 | <p style="text-align: center;">Insertion error gap lengths (context=C1)</p> 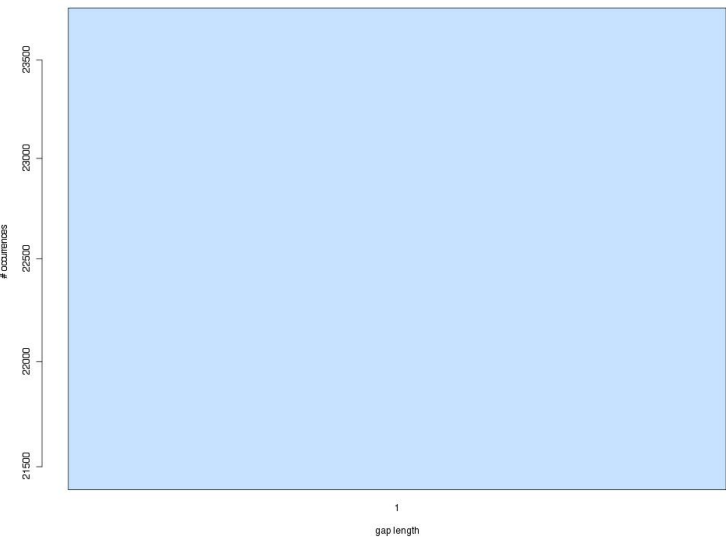  | INVALID/ERROR | INVALID/ERROR |
| G1 | 18008 | <p style="text-align: center;">Insertion error gap lengths (context=G1)</p>  | INVALID/ERROR | INVALID/ERROR |
| T1 | 71668 |                                                                                                                                                                | INVALID/ERROR | INVALID/ERROR |

|    |       |                                                 |               |               |
|----|-------|-------------------------------------------------|---------------|---------------|
|    |       | <p>Insertion error gap lengths (context=T1)</p> |               |               |
| A2 | 35441 | <p>Insertion error gap lengths (context=A2)</p> | INVALID/ERROR | INVALID/ERROR |
| C2 | 12813 | <p>Insertion error gap lengths (context=C2)</p> | INVALID/ERROR | INVALID/ERROR |
|    |       |                                                 |               |               |

|    |       |  |                                                                                                                                            |                                                                                                                                                   |
|----|-------|--|--------------------------------------------------------------------------------------------------------------------------------------------|---------------------------------------------------------------------------------------------------------------------------------------------------|
| G2 | 12475 |  | INVALID/ERROR                                                                                                                              | INVALID/ERROR                                                                                                                                     |
| T2 | 37677 |  | INVALID/ERROR                                                                                                                              | INVALID/ERROR                                                                                                                                     |
| A3 | 17610 |  | <p> <math>s = 5.22755075701805</math><br/> <math>X^2 = 6.71063117080714</math><br/> <math>p\text{-value} = 0.00958397966889613</math> </p> | <p> <math>\beta = 0.0307666905168144</math><br/> <math>X^2 = 32.9376131431273</math><br/> <math>p\text{-value} = 9.51641517145777e-09</math> </p> |
|    |       |  | <p> <math>s = 5.73916711004925</math> </p>                                                                                                 | <p> <math>\beta =</math> </p>                                                                                                                     |

|    |       |                                                 |                                                                                            |                                                                                                     |
|----|-------|-------------------------------------------------|--------------------------------------------------------------------------------------------|-----------------------------------------------------------------------------------------------------|
| C3 | 5170  | <p>Insertion error gap lengths (context=C3)</p> | $X^2 = 1.42617425706320$<br>$p\text{-value} = 0.232389817888495$                           | $X^2 = 0.0212040893600908$<br>$X^2 = 6.59723724054471$<br>$p\text{-value} = 0.010213713117269$      |
| G3 | 4599  | <p>Insertion error gap lengths (context=G3)</p> | $s = 5.56000151973139$<br>$X^2 = 1.13500115649519$<br>$p\text{-value} = 0.286711091735564$ | $\beta = 0.0241884150222789$<br>$X^2 = 7.96514300733158$<br>$p\text{-value} = 0.00476867233788653$  |
| T3 | 18172 | <p>Insertion error gap lengths (context=T3)</p> | $s = 5.09136183694833$<br>$X^2 = 1.81083030039386$<br>$p\text{-value} = 0.178408659637875$ | $\beta = 0.0341748604836566$<br>$X^2 = 69.4456619068442$<br>$p\text{-value} = 7.85489685251306e-17$ |
|    |       |                                                 | $s = 5.88959000897921$                                                                     | $\beta =$                                                                                           |

|                        |                                                 |                                                                                                                |                                                                                                                         |
|------------------------|-------------------------------------------------|----------------------------------------------------------------------------------------------------------------|-------------------------------------------------------------------------------------------------------------------------|
| <p>A4</p> <p>10924</p> | <p>Insertion error gap lengths (context=A4)</p> | <p><math>X^2 =</math><br/>20.7852362987129<br/>p-value =<br/>3.06579622558528e-05</p>                          | <p>0.0207082025997312<br/><math>X^2 =</math><br/>357.810633349254<br/>p-value =<br/>2.00635687781578e-78</p>            |
| <p>C4</p> <p>1640</p>  | <p>Insertion error gap lengths (context=C4)</p> | <p>s = 6.01774467987375<br/><math>X^2 =</math><br/>14.9261417331973<br/>p-value =<br/>0.000573891119684327</p> | <p>beta =<br/>0.0197250448296472<br/><math>X^2 =</math><br/>151.852576988938<br/>p-value =<br/>1.06079600491267e-33</p> |
| <p>G4</p> <p>1516</p>  | <p>Insertion error gap lengths (context=G4)</p> | <p>s = 6.56451405542655<br/><math>X^2 =</math><br/>39.9076253890933<br/>p-value =<br/>2.15858549207793e-09</p> | <p>beta =<br/>0.0143042912873863<br/><math>X^2 =</math><br/>993.75859091435<br/>p-value =<br/>1.61459577227286e-216</p> |

|           |              |                                                 |                                                                                                                          |                                                                                                                                |
|-----------|--------------|-------------------------------------------------|--------------------------------------------------------------------------------------------------------------------------|--------------------------------------------------------------------------------------------------------------------------------|
| <p>T4</p> | <p>11235</p> | <p>Insertion error gap lengths (context=T4)</p> | <p>s = 5.79768276817102<br/> <math>X^2 = 2.59162363336367</math><br/>                 p-value = 0.273675599707333</p>    | <p>beta = 0.021767522855899<br/> <math>X^2 = 289.954090198064</math><br/>                 p-value = 1.08960556043866e-63</p>   |
| <p>A5</p> | <p>9158</p>  | <p>Insertion error gap lengths (context=A5)</p> | <p>s = 6.9784881132812<br/> <math>X^2 = 20.5088244963975</math><br/>                 p-value = 0.00013313238128007</p>   | <p>beta = 0.00951762924507904<br/> <math>X^2 = 14052.3291806063</math><br/>                 p-value = 0</p>                    |
| <p>C5</p> | <p>791</p>   | <p>Insertion error gap lengths (context=C5)</p> | <p>s = 6.27515053954908<br/> <math>X^2 = 28.5957541216234</math><br/>                 p-value = 6.17320770478853e-07</p> | <p>beta = 0.0173913043478261<br/> <math>X^2 = 981.080091092807</math><br/>                 p-value = 9.14460743624929e-214</p> |



G5

756

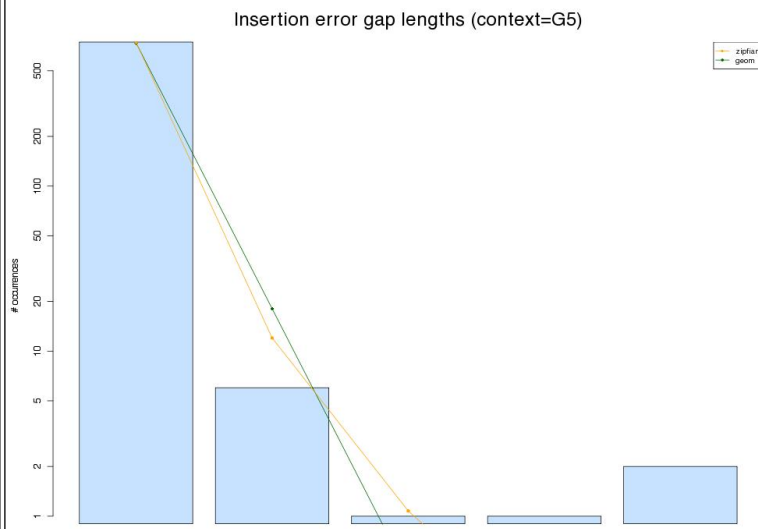

s = 5.94987448525929  
 $X^2 = 80.0561098563668$   
 p-value = 2.98538696130464e-17  
 beta = 0.0245161290322581  
 $X^2 = 15109.3918488239$   
 p-value = 0

T5

9036

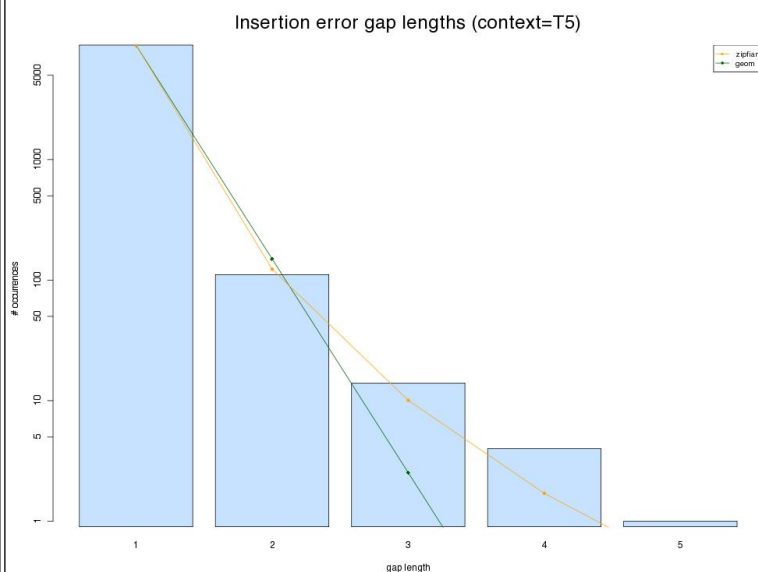

s = 6.17545065788592  
 $X^2 = 6.58838551430183$   
 p-value = 0.0862412169381628  
 beta = 0.0168643237950168  
 $X^2 = 1819.43580975663$   
 p-value = 0

A6

6643

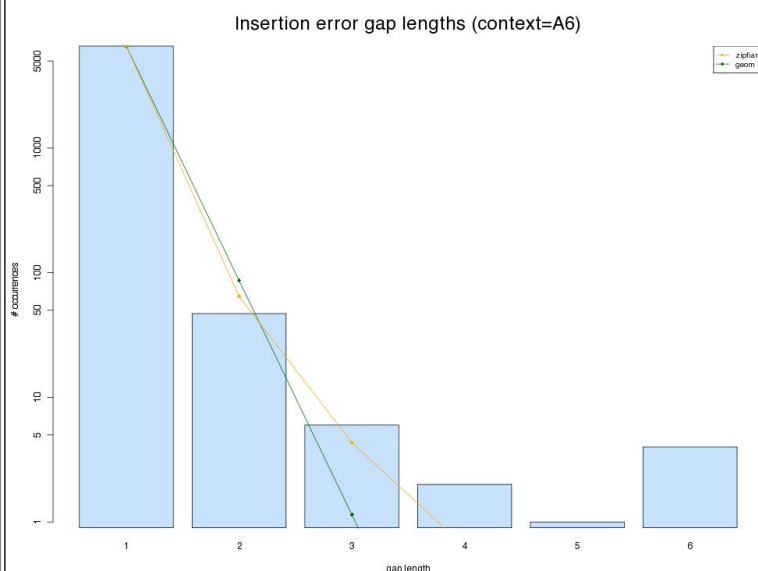

s = 6.66882616104751  
 $X^2 = 381.995539142324$   
 p-value = 2.1578378316663e-81  
 beta = 0.0132204396910279  
 $X^2 = 6049027.1349865$   
 p-value = 0

| C6         | 274           | <p style="text-align: center;">Insertion error gap lengths (context=C6)</p> <table border="1"> <caption>Data for C6 Histogram</caption> <thead> <tr> <th>gap length</th> <th># occurrences</th> </tr> </thead> <tbody> <tr><td>1</td><td>200</td></tr> <tr><td>2</td><td>40</td></tr> <tr><td>3</td><td>10</td></tr> <tr><td>4</td><td>1</td></tr> <tr><td>5</td><td>2</td></tr> </tbody> </table> | gap length | # occurrences | 1 | 200 | 2 | 40 | 3 | 10 | 4 | 1 | 5                                                                                                                                          | 2                                                                                                                                                | <p> <math>s = 4.82912365086547</math><br/> <math>X^2 = 36.695990788652</math><br/> <math>p\text{-value} = 5.33582301700687e-08</math> </p> | <p> <math>\beta = 0.0584192439862544</math><br/> <math>X^2 = 1353.04721601992</math><br/> <math>p\text{-value} = 4.54409415520433e-293</math> </p> |
|------------|---------------|----------------------------------------------------------------------------------------------------------------------------------------------------------------------------------------------------------------------------------------------------------------------------------------------------------------------------------------------------------------------------------------------------|------------|---------------|---|-----|---|----|---|----|---|---|--------------------------------------------------------------------------------------------------------------------------------------------|--------------------------------------------------------------------------------------------------------------------------------------------------|--------------------------------------------------------------------------------------------------------------------------------------------|----------------------------------------------------------------------------------------------------------------------------------------------------|
| gap length | # occurrences |                                                                                                                                                                                                                                                                                                                                                                                                    |            |               |   |     |   |    |   |    |   |   |                                                                                                                                            |                                                                                                                                                  |                                                                                                                                            |                                                                                                                                                    |
| 1          | 200           |                                                                                                                                                                                                                                                                                                                                                                                                    |            |               |   |     |   |    |   |    |   |   |                                                                                                                                            |                                                                                                                                                  |                                                                                                                                            |                                                                                                                                                    |
| 2          | 40            |                                                                                                                                                                                                                                                                                                                                                                                                    |            |               |   |     |   |    |   |    |   |   |                                                                                                                                            |                                                                                                                                                  |                                                                                                                                            |                                                                                                                                                    |
| 3          | 10            |                                                                                                                                                                                                                                                                                                                                                                                                    |            |               |   |     |   |    |   |    |   |   |                                                                                                                                            |                                                                                                                                                  |                                                                                                                                            |                                                                                                                                                    |
| 4          | 1             |                                                                                                                                                                                                                                                                                                                                                                                                    |            |               |   |     |   |    |   |    |   |   |                                                                                                                                            |                                                                                                                                                  |                                                                                                                                            |                                                                                                                                                    |
| 5          | 2             |                                                                                                                                                                                                                                                                                                                                                                                                    |            |               |   |     |   |    |   |    |   |   |                                                                                                                                            |                                                                                                                                                  |                                                                                                                                            |                                                                                                                                                    |
| G6         | 187           | <p style="text-align: center;">Insertion error gap lengths (context=G6)</p> <table border="1"> <caption>Data for G6 Histogram</caption> <thead> <tr> <th>gap length</th> <th># occurrences</th> </tr> </thead> <tbody> <tr><td>1</td><td>100</td></tr> <tr><td>2</td><td>40</td></tr> <tr><td>3</td><td>10</td></tr> <tr><td>4</td><td>2</td></tr> </tbody> </table>                               | gap length | # occurrences | 1 | 100 | 2 | 40 | 3 | 10 | 4 | 2 | <p> <math>s = 4.62312722172168</math><br/> <math>X^2 = 11.3877263848567</math><br/> <math>p\text{-value} = 0.00336656213791751</math> </p> | <p> <math>\beta = 0.0603015075376885</math><br/> <math>X^2 = 104.26439379144</math><br/> <math>p\text{-value} = 2.28704420379750e-23</math> </p> |                                                                                                                                            |                                                                                                                                                    |
| gap length | # occurrences |                                                                                                                                                                                                                                                                                                                                                                                                    |            |               |   |     |   |    |   |    |   |   |                                                                                                                                            |                                                                                                                                                  |                                                                                                                                            |                                                                                                                                                    |
| 1          | 100           |                                                                                                                                                                                                                                                                                                                                                                                                    |            |               |   |     |   |    |   |    |   |   |                                                                                                                                            |                                                                                                                                                  |                                                                                                                                            |                                                                                                                                                    |
| 2          | 40            |                                                                                                                                                                                                                                                                                                                                                                                                    |            |               |   |     |   |    |   |    |   |   |                                                                                                                                            |                                                                                                                                                  |                                                                                                                                            |                                                                                                                                                    |
| 3          | 10            |                                                                                                                                                                                                                                                                                                                                                                                                    |            |               |   |     |   |    |   |    |   |   |                                                                                                                                            |                                                                                                                                                  |                                                                                                                                            |                                                                                                                                                    |
| 4          | 2             |                                                                                                                                                                                                                                                                                                                                                                                                    |            |               |   |     |   |    |   |    |   |   |                                                                                                                                            |                                                                                                                                                  |                                                                                                                                            |                                                                                                                                                    |
|            |               |                                                                                                                                                                                                                                                                                                                                                                                                    |            |               |   |     |   |    |   |    |   |   |                                                                                                                                            |                                                                                                                                                  |                                                                                                                                            |                                                                                                                                                    |

|    |      |                                                 |                                                                                                                         |                                                                                                            |
|----|------|-------------------------------------------------|-------------------------------------------------------------------------------------------------------------------------|------------------------------------------------------------------------------------------------------------|
| T6 | 7257 | <p>Insertion error gap lengths (context=T6)</p> | <p>s = 6.52903164872844<br/> <math>X^2 = 1689.17955814413</math><br/>                 p-value = 0</p>                   | <p>beta = 0.0164001084304689<br/> <math>X^2 = 11810863.9827508</math><br/>                 p-value = 0</p> |
| A7 | 3524 | <p>Insertion error gap lengths (context=A7)</p> | <p>s = 5.82207914182774<br/> <math>X^2 = 356.63757252199</math><br/>                 p-value = 6.46786427391924e-76</p> | <p>beta = 0.0257119159524468<br/> <math>X^2 = 935738.018539229</math><br/>                 p-value = 0</p> |
| C7 | 57   | <p>Insertion error gap lengths (context=C7)</p> | <p>INVALID/ERROR</p>                                                                                                    | <p>INVALID/ERROR</p>                                                                                       |

|    |      |  |                                                                                                                              |                                                                                                                |
|----|------|--|------------------------------------------------------------------------------------------------------------------------------|----------------------------------------------------------------------------------------------------------------|
| G7 | 24   |  | INVALID/ERROR                                                                                                                | INVALID/ERROR                                                                                                  |
| T7 | 3699 |  | <p>s = 5.62040209644576<br/> <math>X^2 = 279.256223800628</math><br/>                     p-value = 2.87582012106314e-58</p> | <p>beta = 0.0309143306261462<br/> <math>X^2 = 5124130.17618897</math><br/>                     p-value = 0</p> |
| A8 | 1357 |  | <p>s = 5.17264169630761<br/> <math>X^2 = 219.903733264580</math><br/>                     p-value = 1.09090153957858e-44</p> | <p>beta = 0.047719298245614<br/> <math>X^2 = 5759044.51146547</math><br/>                     p-value = 0</p>  |

|    |      |                                                                                                                                      |                                                                                                                            |                                                                                                                                   |
|----|------|--------------------------------------------------------------------------------------------------------------------------------------|----------------------------------------------------------------------------------------------------------------------------|-----------------------------------------------------------------------------------------------------------------------------------|
| C8 | 9    | 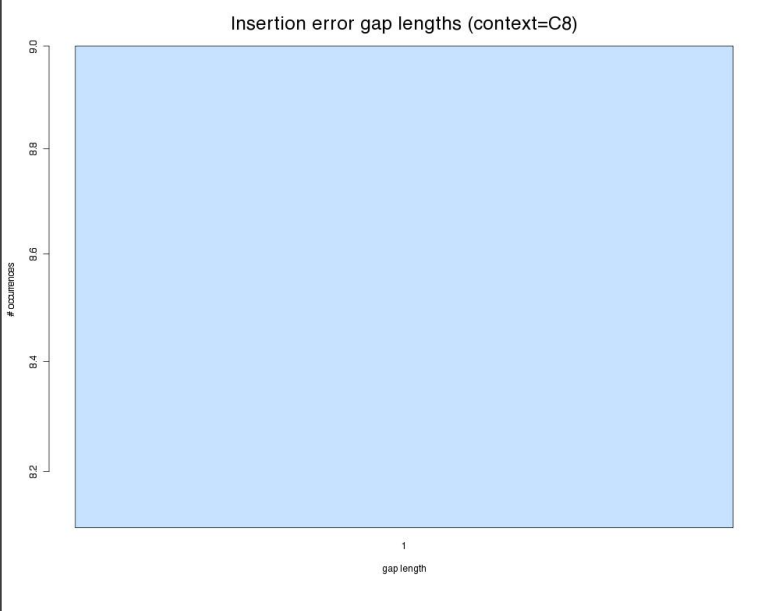 <p>Insertion error gap lengths (context=C8)</p>   | INVALID/ERROR                                                                                                              | INVALID/ERROR                                                                                                                     |
| G8 | 4    |  <p>Insertion error gap lengths (context=G8)</p>  | INVALID/ERROR                                                                                                              | INVALID/ERROR                                                                                                                     |
| T8 | 1693 |  <p>Insertion error gap lengths (context=T8)</p> | <p>s = 5.14929370914316<br/> <math>X^2 = 0.950640382989156</math><br/>                     p-value = 0.813193053063198</p> | <p>beta = 0.0364257256687536<br/> <math>X^2 = 367.305036556666</math><br/>                     p-value = 2.66904451545112e-79</p> |

|            |            |                                                  |                                                                                                                          |                                                                                                                               |
|------------|------------|--------------------------------------------------|--------------------------------------------------------------------------------------------------------------------------|-------------------------------------------------------------------------------------------------------------------------------|
| <p>A9</p>  | <p>335</p> | <p>Insertion error gap lengths (context=A9)</p>  | <p>s = 3.60428937456304<br/> <math>X^2 = 54.4275692085391</math><br/>                 p-value = 6.04841321290567e-10</p> | <p>beta = 0.1625<br/> <math>X^2 = 10963.0473943865</math><br/>                 p-value = 0</p>                                |
| <p>T9</p>  | <p>505</p> | <p>Insertion error gap lengths (context=T9)</p>  | <p>s = 4.71174780885746<br/> <math>X^2 = 0.336821858718806</math><br/>                 p-value = 0.845006525339594</p>   | <p>beta = 0.0489642184557439<br/> <math>X^2 = 17.3013082915693</math><br/>                 p-value = 0.000175012327128963</p> |
| <p>A10</p> | <p>74</p>  | <p>Insertion error gap lengths (context=A10)</p> | <p>s = 1.98544444700454<br/> <math>X^2 = 20.4711674831067</math><br/>                 p-value = 0.00869312636262025</p>  | <p>beta = 0.528662420382166<br/> <math>X^2 = 111.264248688278</math><br/>                 p-value = 2.09277970097283e-20</p>  |

| T10        | 84            | <p>Insertion error gap lengths (context=T10)</p> <table border="1"> <thead> <tr> <th>gap length</th> <th># occurrences</th> </tr> </thead> <tbody> <tr> <td>1</td> <td>65</td> </tr> <tr> <td>2</td> <td>10</td> </tr> </tbody> </table> | gap length | # occurrences | 1 | 65 | 2 | 10 | INVALID/ERROR | INVALID/ERROR |
|------------|---------------|------------------------------------------------------------------------------------------------------------------------------------------------------------------------------------------------------------------------------------------|------------|---------------|---|----|---|----|---------------|---------------|
| gap length | # occurrences |                                                                                                                                                                                                                                          |            |               |   |    |   |    |               |               |
| 1          | 65            |                                                                                                                                                                                                                                          |            |               |   |    |   |    |               |               |
| 2          | 10            |                                                                                                                                                                                                                                          |            |               |   |    |   |    |               |               |
| A11        | 11            | <p>Insertion error gap lengths (context=A11)</p> <table border="1"> <thead> <tr> <th>gap length</th> <th># occurrences</th> </tr> </thead> <tbody> <tr> <td>1</td> <td>10</td> </tr> <tr> <td>2</td> <td>1</td> </tr> </tbody> </table>  | gap length | # occurrences | 1 | 10 | 2 | 1  | INVALID/ERROR | INVALID/ERROR |
| gap length | # occurrences |                                                                                                                                                                                                                                          |            |               |   |    |   |    |               |               |
| 1          | 10            |                                                                                                                                                                                                                                          |            |               |   |    |   |    |               |               |
| 2          | 1             |                                                                                                                                                                                                                                          |            |               |   |    |   |    |               |               |
| T11        | 12            | <p>Insertion error gap lengths (context=T11)</p> <table border="1"> <thead> <tr> <th>gap length</th> <th># occurrences</th> </tr> </thead> <tbody> <tr> <td>1</td> <td>10</td> </tr> <tr> <td>2</td> <td>2</td> </tr> </tbody> </table>  | gap length | # occurrences | 1 | 10 | 2 | 2  | INVALID/ERROR | INVALID/ERROR |
| gap length | # occurrences |                                                                                                                                                                                                                                          |            |               |   |    |   |    |               |               |
| 1          | 10            |                                                                                                                                                                                                                                          |            |               |   |    |   |    |               |               |
| 2          | 2             |                                                                                                                                                                                                                                          |            |               |   |    |   |    |               |               |
|            |               |                                                                                                                                                                                                                                          |            |               |   |    |   |    |               |               |

|                      |  |                                                                                                                       |                                                                                                                            |
|----------------------|--|-----------------------------------------------------------------------------------------------------------------------|----------------------------------------------------------------------------------------------------------------------------|
| <p>A12</p> <p>19</p> |  | <p>s = 0.48582025011493<br/> <math>X^2 = 6.39752241617023</math><br/>                 p-value = 0.780833096790237</p> | <p>beta = 0.825688073394495<br/> <math>X^2 = 20.3430308947208</math><br/>                 p-value = 0.0261701386048254</p> |
| <p>T12</p> <p>9</p>  |  | <p>INVALID/ERROR</p>                                                                                                  | <p>INVALID/ERROR</p>                                                                                                       |
| <p>A13</p> <p>6</p>  |  | <p>INVALID/ERROR</p>                                                                                                  | <p>INVALID/ERROR</p>                                                                                                       |
|                      |  | <p>s = 0.726652312800867</p>                                                                                          | <p>beta =</p>                                                                                                              |



|     |    |                                                  |                                                                                             |                                                                                                  |
|-----|----|--------------------------------------------------|---------------------------------------------------------------------------------------------|--------------------------------------------------------------------------------------------------|
| T13 | 17 | <p>Insertion error gap lengths (context=T13)</p> | $X^2 = 2.77169644219901$<br>$p\text{-value} = 0.596728220237383$                            | $X^2 = 0.645833333333333$<br>$X^2 = 8.98360110407515$<br>$p\text{-value} = 0.0615106849103599$   |
| A14 | 6  | <p>Insertion error gap lengths (context=A14)</p> | $s = 1.48067490131275$<br>$X^2 = 0.187932256182633$<br>$p\text{-value} = 0.664643183539403$ | $\beta = 0.333333333333333$<br>$X^2 = 0.777777777777777$<br>$p\text{-value} = 0.377821637100064$ |
| T14 | 19 | <p>Insertion error gap lengths (context=T14)</p> | $s = 0.158340782125942$<br>$X^2 = 3.62440875567043$<br>$p\text{-value} = 0.98930084112182$  | $\beta = 0.860294117647059$<br>$X^2 = 13.3133502327496$<br>$p\text{-value} = 0.346682418843568$  |

|            |           |                                                  |                                                                                                                         |                                                                                                                           |
|------------|-----------|--------------------------------------------------|-------------------------------------------------------------------------------------------------------------------------|---------------------------------------------------------------------------------------------------------------------------|
| <p>A15</p> | <p>8</p>  | <p>Insertion error gap lengths (context=A15)</p> | <p>s = 0.133607967762624<br/> <math>X^2 = 0.956544519940105</math><br/>                 p-value = 0.916312105293699</p> | <p>beta = 0.714285714285714<br/> <math>X^2 = 6.45063753096074</math><br/>                 p-value = 0.167927311967506</p> |
| <p>T15</p> | <p>13</p> | <p>Insertion error gap lengths (context=T15)</p> | <p>s = 0.503487237546934<br/> <math>X^2 = 1.83378665329945</math><br/>                 p-value = 0.93433281140829</p>   | <p>beta = 0.74<br/> <math>X^2 = 7.22325554211319</math><br/>                 p-value = 0.30069337583502</p>               |
| <p>A16</p> | <p>7</p>  | <p>Insertion error gap lengths (context=A16)</p> | <p>s = 0.132318446655207<br/> <math>X^2 = 0.827590945557859</math><br/>                 p-value = 0.842856893927945</p> | <p>beta = 0.666666666666667<br/> <math>X^2 = 5.52461787184009</math><br/>                 p-value = 0.137173588026781</p> |

|     |   |                                                                                                                                                                  |               |               |
|-----|---|------------------------------------------------------------------------------------------------------------------------------------------------------------------|---------------|---------------|
|     |   |                                                                                                                                                                  |               |               |
| T16 | 2 | <p style="text-align: center;">Insertion error gap lengths (context=T16)</p>   | INVALID/ERROR | INVALID/ERROR |
| A17 | 1 | <p style="text-align: center;">Insertion error gap lengths (context=A17)</p>  | INVALID/ERROR | INVALID/ERROR |
|     |   |                                                                                                                                                                  |               |               |

| T17        | 5             | <p>Insertion error gap lengths (context=T17)</p> 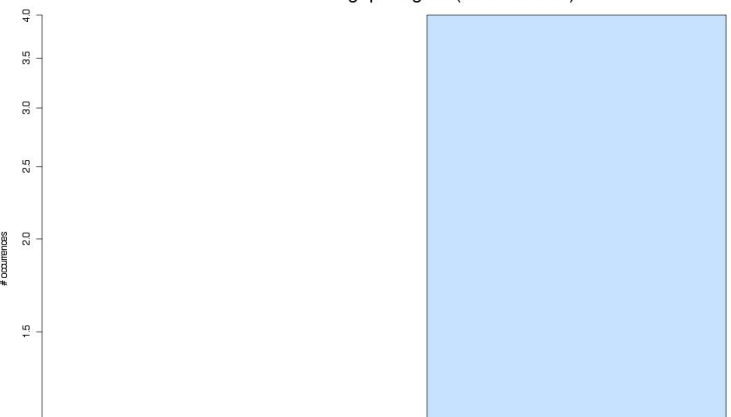 <table border="1"> <caption>Insertion error gap lengths (context=T17)</caption> <thead> <tr> <th>gap length</th> <th># occurrences</th> </tr> </thead> <tbody> <tr> <td>3</td> <td>4.0</td> </tr> </tbody> </table>                                                                        | gap length                                                                                           | # occurrences                                                          | 3 | 4.0 | INVALID/ERROR | INVALID/ERROR |   |     |               |               |
|------------|---------------|-------------------------------------------------------------------------------------------------------------------------------------------------------------------------------------------------------------------------------------------------------------------------------------------------------------------------------------------------------------------------------------------------------------------------------|------------------------------------------------------------------------------------------------------|------------------------------------------------------------------------|---|-----|---------------|---------------|---|-----|---------------|---------------|
| gap length | # occurrences |                                                                                                                                                                                                                                                                                                                                                                                                                               |                                                                                                      |                                                                        |   |     |               |               |   |     |               |               |
| 3          | 4.0           |                                                                                                                                                                                                                                                                                                                                                                                                                               |                                                                                                      |                                                                        |   |     |               |               |   |     |               |               |
| T18        | 4             | <p>Insertion error gap lengths (context=T18)</p>  <table border="1"> <caption>Insertion error gap lengths (context=T18)</caption> <thead> <tr> <th>gap length</th> <th># occurrences</th> </tr> </thead> <tbody> <tr> <td>1</td> <td>1.0</td> </tr> <tr> <td>2</td> <td>1.0</td> </tr> <tr> <td>3</td> <td>2.0</td> </tr> </tbody> </table> | gap length                                                                                           | # occurrences                                                          | 1 | 1.0 | 2             | 1.0           | 3 | 2.0 | INVALID/ERROR | INVALID/ERROR |
| gap length | # occurrences |                                                                                                                                                                                                                                                                                                                                                                                                                               |                                                                                                      |                                                                        |   |     |               |               |   |     |               |               |
| 1          | 1.0           |                                                                                                                                                                                                                                                                                                                                                                                                                               |                                                                                                      |                                                                        |   |     |               |               |   |     |               |               |
| 2          | 1.0           |                                                                                                                                                                                                                                                                                                                                                                                                                               |                                                                                                      |                                                                        |   |     |               |               |   |     |               |               |
| 3          | 2.0           |                                                                                                                                                                                                                                                                                                                                                                                                                               |                                                                                                      |                                                                        |   |     |               |               |   |     |               |               |
| T19        | 5             |                                                                                                                                                                                                                                                                                                                                                                                                                               | <p>s =<br/>0.0926542887493549<br/>X^2 =<br/>0.395050902693468<br/>p-value =<br/>0.52965630969129</p> | <p>beta = 0.5<br/>X^2 = 3.175<br/>p-value =<br/>0.0747732118999497</p> |   |     |               |               |   |     |               |               |

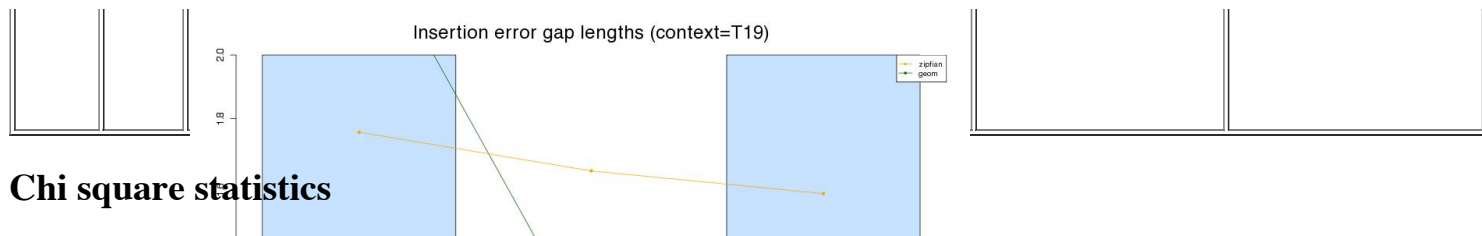

### Chi square statistics

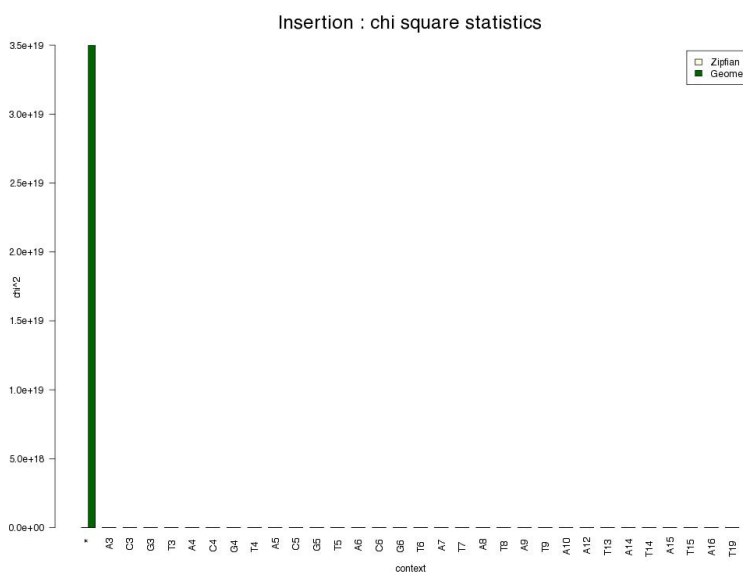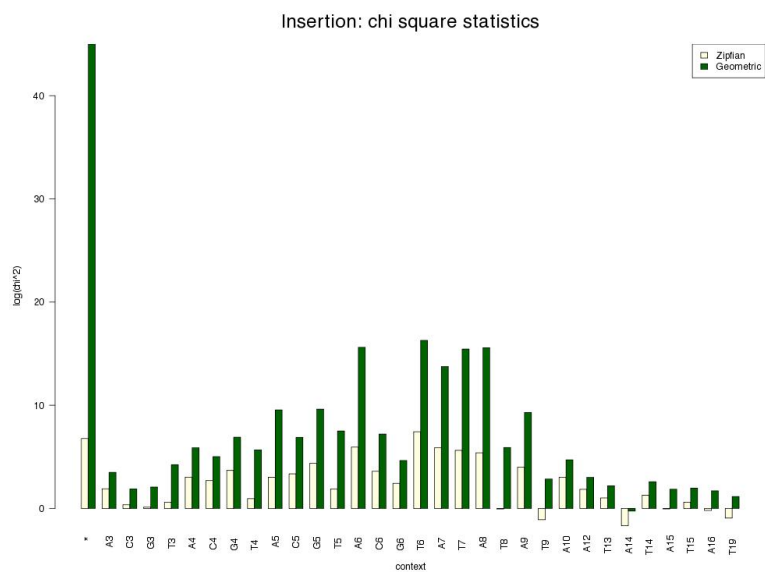

### Average Pearson's residuals

Insertion: Average Pearson residuals

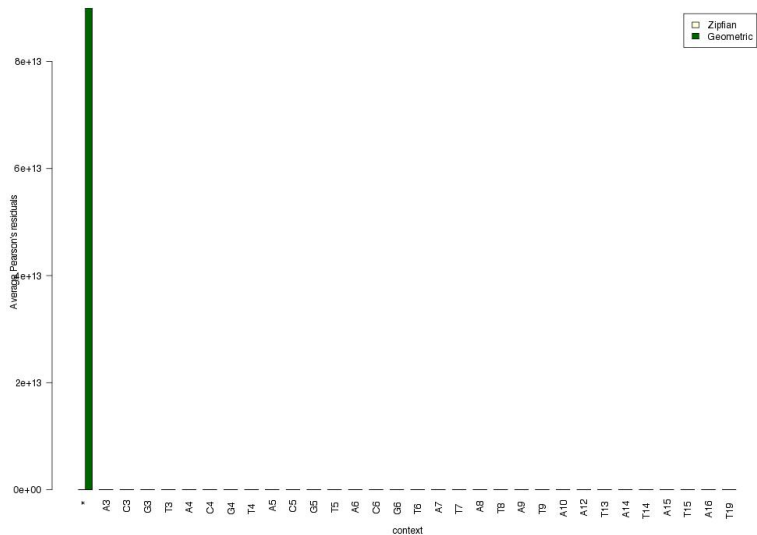

Insertion : Average Pearson residuals

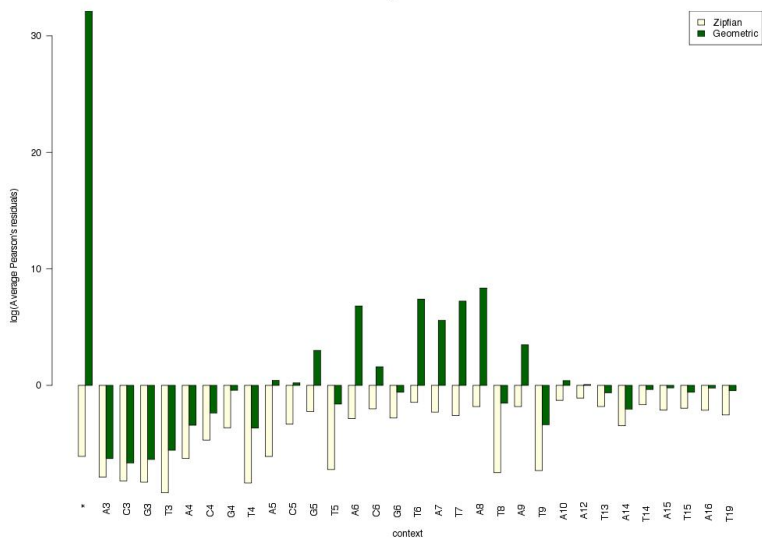

Insertion: Difference between average Pearson residuals

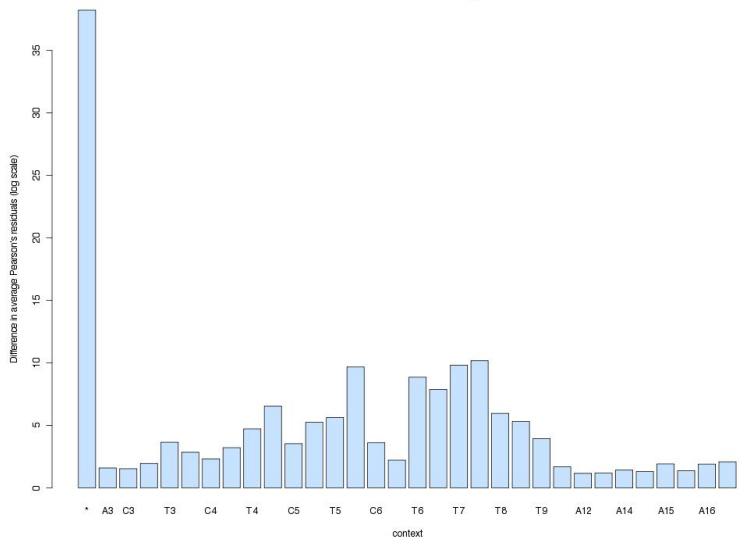

## Mann U Tests

Insertion : Mann-Whitney tests by context

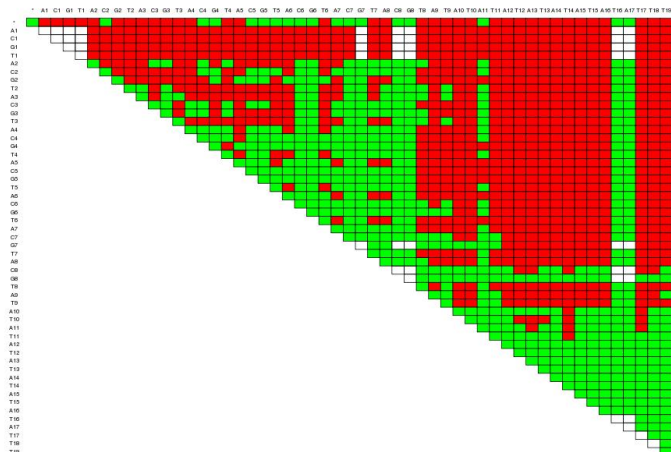

## Mann U Tests by context length

Insertion : Mann-Whitney tests by context length

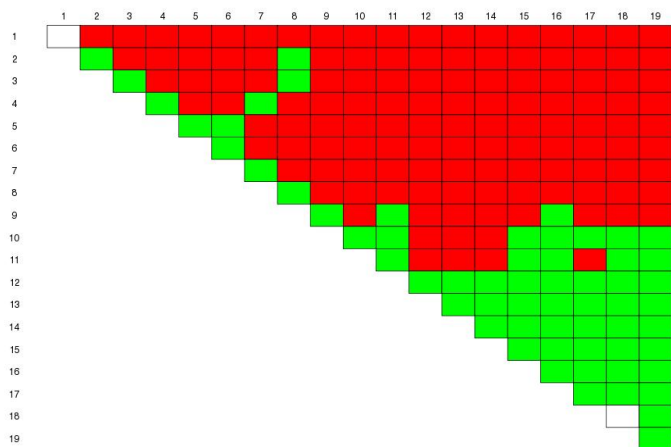

## newbler Deletion

### Deletion per context

Deletion: number of gaps per context

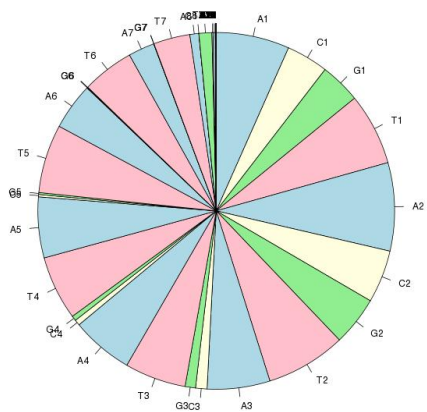

Total: 287991

Deletion per context

Deletion: percentage of gaps per context

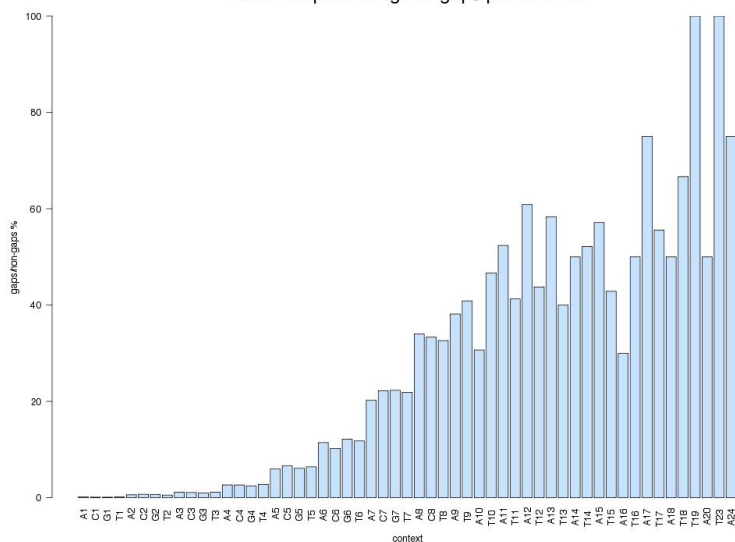

| Context | #Data  | Gap lengths                                     | Zipfian fit                                                                                                                               | Geom fit                                                                                                                   |
|---------|--------|-------------------------------------------------|-------------------------------------------------------------------------------------------------------------------------------------------|----------------------------------------------------------------------------------------------------------------------------|
| *       | 287991 | <p>Deletion error gap lengths (context=any)</p> | <p>s = 3.7303818124779<br/> <math>X^2 = 1525.89089781184</math><br/>                     p-value = <math>4.94065645841247e-323</math></p> | <p>beta = <math>0.121906376439524</math><br/> <math>X^2 = 65921.9611596078</math><br/>                     p-value = 0</p> |



|           |              |                                                                                                                                     |                      |                      |
|-----------|--------------|-------------------------------------------------------------------------------------------------------------------------------------|----------------------|----------------------|
| <p>A1</p> | <p>19138</p> | <p>Deletion error gap lengths (context=A1)</p> 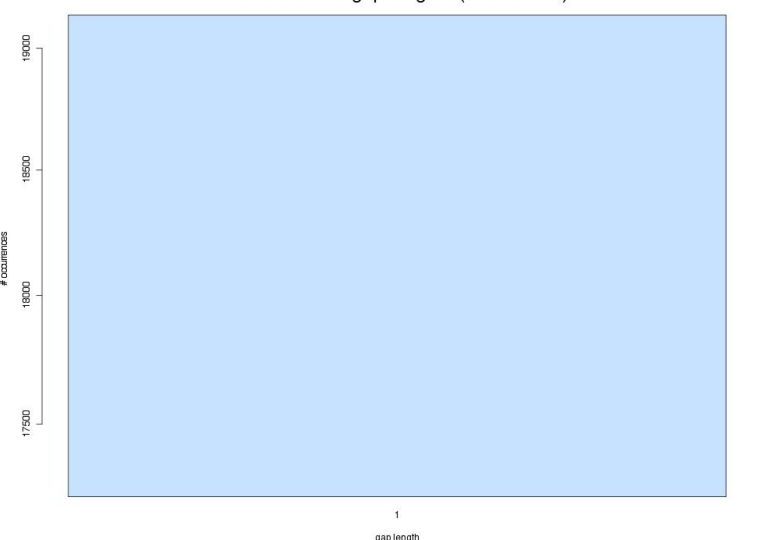   | <p>INVALID/ERROR</p> | <p>INVALID/ERROR</p> |
| <p>C1</p> | <p>10940</p> | <p>Deletion error gap lengths (context=C1)</p>   | <p>INVALID/ERROR</p> | <p>INVALID/ERROR</p> |
| <p>G1</p> | <p>10591</p> | <p>Deletion error gap lengths (context=G1)</p>  | <p>INVALID/ERROR</p> | <p>INVALID/ERROR</p> |
|           |              |                                                                                                                                     |                      |                      |

|    |       |                                                                                                                                     |               |               |
|----|-------|-------------------------------------------------------------------------------------------------------------------------------------|---------------|---------------|
| T1 | 18759 | <p>Deletion error gap lengths (context=T1)</p> 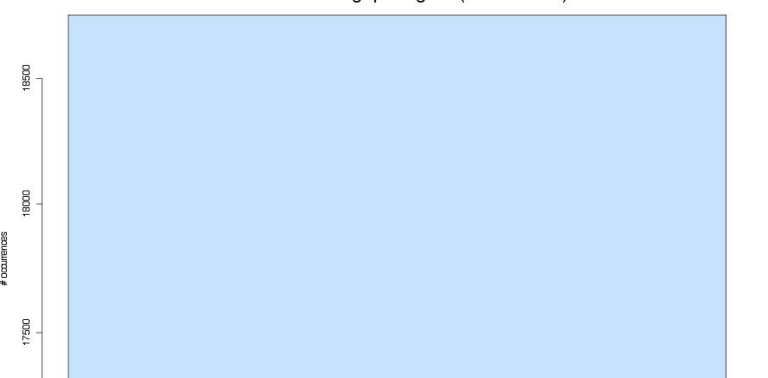   | INVALID/ERROR | INVALID/ERROR |
| A2 | 23020 | <p>Deletion error gap lengths (context=A2)</p>   | INVALID/ERROR | INVALID/ERROR |
| C2 | 13752 | <p>Deletion error gap lengths (context=C2)</p>  | INVALID/ERROR | INVALID/ERROR |

|    |       |  |                                                                                                                                              |                                                                                                                                                 |
|----|-------|--|----------------------------------------------------------------------------------------------------------------------------------------------|-------------------------------------------------------------------------------------------------------------------------------------------------|
| G2 | 12874 |  | INVALID/ERROR                                                                                                                                | INVALID/ERROR                                                                                                                                   |
| T2 | 20908 |  | INVALID/ERROR                                                                                                                                | INVALID/ERROR                                                                                                                                   |
| A3 | 16382 |  | <p> <math>s = 2.03189175918716</math><br/> <math>X^2 = 817.976271148564</math><br/> <math>p\text{-value} = 6.66422943205951e-180</math> </p> | <p> <math>\beta = 0.243430471528195</math><br/> <math>X^2 = 439.83414022268</math><br/> <math>p\text{-value} = 1.17636938323754e-97</math> </p> |

|    |       |                                                                                                                                     |                                                                                                                              |                                                                                                                                  |
|----|-------|-------------------------------------------------------------------------------------------------------------------------------------|------------------------------------------------------------------------------------------------------------------------------|----------------------------------------------------------------------------------------------------------------------------------|
| C3 | 2976  | <p>Deletion error gap lengths (context=C3)</p> 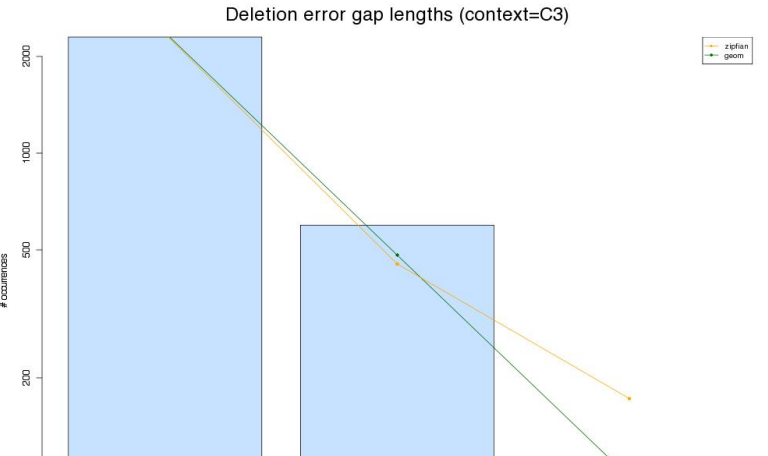   | <p>s = 2.37858007008878<br/> <math>X^2 = 96.0306422172164</math><br/>                     p-value = 1.13119058398999e-22</p> | <p>beta = 0.203212851405623<br/> <math>X^2 = 32.6954845870646</math><br/>                     p-value = 1.07787328561388e-08</p> |
| G3 | 2722  | <p>Deletion error gap lengths (context=G3)</p>   | <p>s = 2.63735018691134<br/> <math>X^2 = 133.154604880583</math><br/>                     p-value = 8.36381461255204e-31</p> | <p>beta = 0.172644376899696<br/> <math>X^2 = 59.1306357588239</math><br/>                     p-value = 1.47544170844702e-14</p> |
| T3 | 16011 | <p>Deletion error gap lengths (context=T3)</p>  | <p>s = 2.31285133884244<br/> <math>X^2 = 74.84817906128</math><br/>                     p-value = 5.0833925638005e-18</p>    | <p>beta = 0.215915768854065<br/> <math>X^2 = 80.9326996652077</math><br/>                     p-value = 2.33537137181142e-19</p> |
|    |       |                                                                                                                                     | <p>s = 2.56270880377719<br/> <math>X^2 = 881.606024178574</math></p>                                                         | <p>beta = 0.237194604282615</p>                                                                                                  |

|    |       |                                                |                                                                                                             |                                                                                                                     |
|----|-------|------------------------------------------------|-------------------------------------------------------------------------------------------------------------|---------------------------------------------------------------------------------------------------------------------|
| A4 | 16173 | <p>Deletion error gap lengths (context=A4)</p> | <p>p-value =<br/>3.64488846510436e-192</p>                                                                  | <p>X<sup>2</sup> =<br/>1818.25405369029<br/>p-value = 0</p>                                                         |
| C4 | 1477  | <p>Deletion error gap lengths (context=C4)</p> | <p>s = 2.88939322208711<br/>X<sup>2</sup> =<br/>96.3777553423416<br/>p-value =<br/>1.17987592153131e-21</p> | <p>beta =<br/>0.190684931506849<br/>X<sup>2</sup> =<br/>170.434040899389<br/>p-value =<br/>9.78854754134094e-38</p> |
| G4 | 1283  | <p>Deletion error gap lengths (context=G4)</p> | <p>s = 2.85162448699112<br/>X<sup>2</sup> =<br/>82.6663128330726<br/>p-value =<br/>1.12005216191009e-18</p> | <p>beta =<br/>0.194095477386935<br/>X<sup>2</sup> =<br/>142.720211396448<br/>p-value =<br/>1.02023417531867e-31</p> |
|    |       |                                                |                                                                                                             |                                                                                                                     |

T4

16759

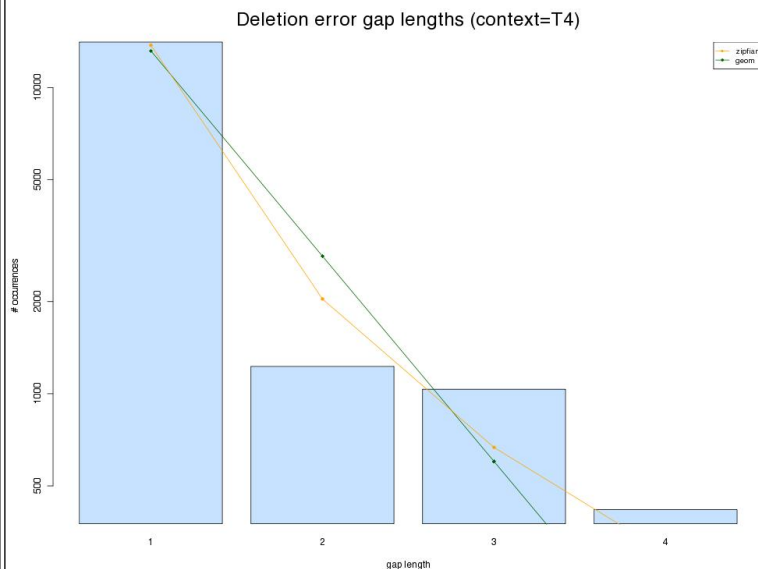

s = 2.75317464623204  
 $X^2 = 575.549475856226$   
 p-value = 1.04958903901607e-125

beta = 0.213524801726970  
 $X^2 = 1921.50787640793$   
 p-value = 0

A5

15857

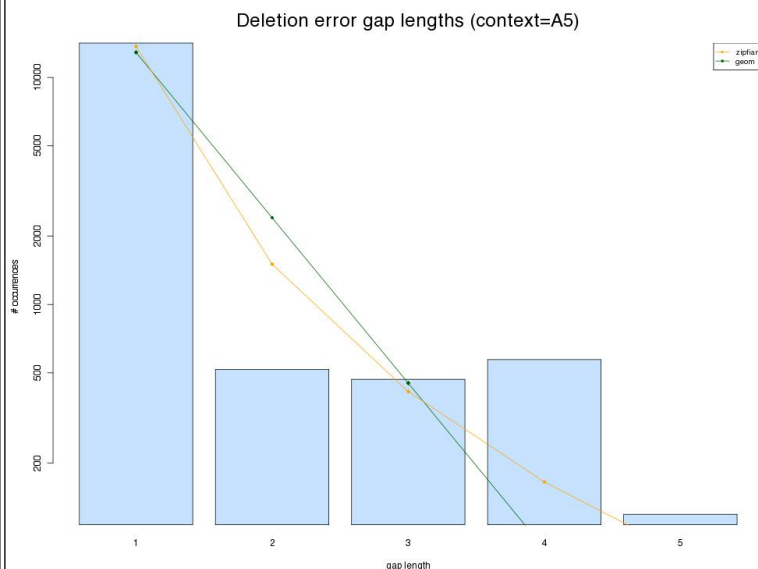

s = 3.18594408676657  
 $X^2 = 1690.76087031724$   
 p-value = 0

beta = 0.186903907291560  
 $X^2 = 5120.60527690562$   
 p-value = 0

C5

602

s = 3.22114903235939  
 $X^2 = 33.9044961109349$   
 p-value = 4.34242387382752e-08

beta = 0.162726008344923  
 $X^2 = 123.301006163010$   
 p-value = 1.68084127891389e-27

|    |       |                                                                                                                                     |                                                                                                           |                                                                                                              |
|----|-------|-------------------------------------------------------------------------------------------------------------------------------------|-----------------------------------------------------------------------------------------------------------|--------------------------------------------------------------------------------------------------------------|
|    |       | <p>Deletion error gap lengths (context=C5)</p> 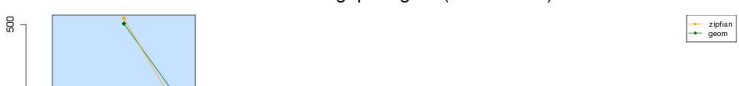   |                                                                                                           |                                                                                                              |
| G5 | 507   | <p>Deletion error gap lengths (context=G5)</p>    | <p>s = 3.64224010188977<br/> <math>X^2 = 39.6002660625332</math><br/> p-value = 2.51716383567049e-09</p>  | <p>beta = 0.124352331606218<br/> <math>X^2 = 129.624900788309</math><br/> p-value = 7.11722073259331e-29</p> |
| T5 | 17910 | <p>Deletion error gap lengths (context=T5)</p>  | <p>s = 3.33412681446039<br/> <math>X^2 = 1316.02203584982</math><br/> p-value = 4.91300443257319e-285</p> | <p>beta = 0.167712254286909<br/> <math>X^2 = 5531.27562958112</math><br/> p-value = 0</p>                    |

|    |       |                                                                            |                                                                                                                                            |                                                                                                                                                            |
|----|-------|----------------------------------------------------------------------------|--------------------------------------------------------------------------------------------------------------------------------------------|------------------------------------------------------------------------------------------------------------------------------------------------------------|
| A6 | 12208 | <p style="text-align: center;">Deletion error gap lengths (context=A6)</p> | <p>s = 3.71940721430899<br/> <math>X^2 = 1466.98118513617</math><br/>                     p-value = <math>2.06571000652441e-316</math></p> | <p>beta = <math>0.141490857946554</math><br/> <math>X^2 = 13401.8102381151</math><br/>                     p-value = 0</p>                                 |
| C6 | 141   | <p style="text-align: center;">Deletion error gap lengths (context=C6)</p> | <p>s = 3.25837579750473<br/> <math>X^2 = 15.0286023977881</math><br/>                     p-value = <math>0.00464226003314742</math></p>   | <p>beta = <math>0.194285714285714</math><br/> <math>X^2 = 96.3965818339653</math><br/>                     p-value = <math>5.75040236184136e-20</math></p> |
| G6 | 147   | <p style="text-align: center;">Deletion error gap lengths (context=G6)</p> | <p>s = 3.00975917382199<br/> <math>X^2 = 38.0424107624465</math><br/>                     p-value = <math>2.76863772356009e-08</math></p>  | <p>beta = <math>0.226315789473684</math><br/> <math>X^2 = 86.4104282104048</math><br/>                     p-value = <math>1.29234522536602e-18</math></p> |
|    |       |                                                                            | <p>s = 3.68526340601055<br/> <math>X^2 = 1326.62932782919</math></p>                                                                       | <p>beta = <math>0.143838205645161</math></p>                                                                                                               |



|    |       |                                                |                                                                                                              |                                                                                             |
|----|-------|------------------------------------------------|--------------------------------------------------------------------------------------------------------------|---------------------------------------------------------------------------------------------|
| T6 | 13589 | <p>Deletion error gap lengths (context=T6)</p> | <p>p-value =<br/>5.60370849810637e-286</p>                                                                   | <p>X<sup>2</sup> =<br/>15006.5288421020<br/>p-value = 0</p>                                 |
| A7 | 6845  | <p>Deletion error gap lengths (context=A7)</p> | <p>s = 4.00062180678743<br/>X<sup>2</sup> =<br/>993.184452956652<br/>p-value =<br/>1.79643340644771e-212</p> | <p>beta =<br/>0.12232337479164<br/>X<sup>2</sup> =<br/>73200.6856035933<br/>p-value = 0</p> |
| C7 | 50    | <p>Deletion error gap lengths (context=C7)</p> | <p>INVALID/ERROR</p>                                                                                         | <p>INVALID/ERROR</p>                                                                        |
|    |       |                                                | <p>s = 2.70175083232825</p>                                                                                  | <p>beta =</p>                                                                               |

|    |      |                                                |                                                                                             |                                                                                      |
|----|------|------------------------------------------------|---------------------------------------------------------------------------------------------|--------------------------------------------------------------------------------------|
| G7 | 33   | <p>Deletion error gap lengths (context=G7)</p> | $X^2 =$<br>4.18906574896551<br>p-value =<br>0.123127746334631                               | 0.232558139534884<br>$X^2 =$<br>11.8271425166488<br>p-value =<br>0.00270251824227842 |
| T7 | 9512 | <p>Deletion error gap lengths (context=T7)</p> | $s = 4.06371799446981$<br>$X^2 =$<br>958.696932683944<br>p-value =<br>5.25176491050475e-205 | beta =<br>0.112355356476297<br>$X^2 =$<br>61614.5294143215<br>p-value = 0            |
| A8 | 2359 | <p>Deletion error gap lengths (context=A8)</p> | $s = 4.22020049664641$<br>$X^2 =$<br>53.552910330594<br>p-value =<br>2.58953003815933e-10   | beta =<br>0.0856589147286821<br>$X^2 =$<br>19943.6924692809<br>p-value = 0           |

|    |      |                                                                                                                                     |                                                                                                                              |                                                                                                               |
|----|------|-------------------------------------------------------------------------------------------------------------------------------------|------------------------------------------------------------------------------------------------------------------------------|---------------------------------------------------------------------------------------------------------------|
| C8 | 3    |  <p>Deletion error gap lengths (context=C8)</p>   | INVALID/ERROR                                                                                                                | INVALID/ERROR                                                                                                 |
| T8 | 3368 |  <p>Deletion error gap lengths (context=T8)</p>  | <p>s = 4.02454690142885<br/> <math>X^2 = 77.4980669818713</math><br/>                     p-value = 1.17329308708217e-14</p> | <p>beta = 0.102106105038656<br/> <math>X^2 = 36527.5187618464</math><br/>                     p-value = 0</p> |
| A9 | 316  |  <p>Deletion error gap lengths (context=A9)</p> | <p>s = 2.81494311138736<br/> <math>X^2 = 46.7120990855964</math><br/>                     p-value = 6.352231534372e-08</p>   | <p>beta = 0.285067873303167<br/> <math>X^2 = 2609.75024885114</math><br/>                     p-value = 0</p> |

T9

563

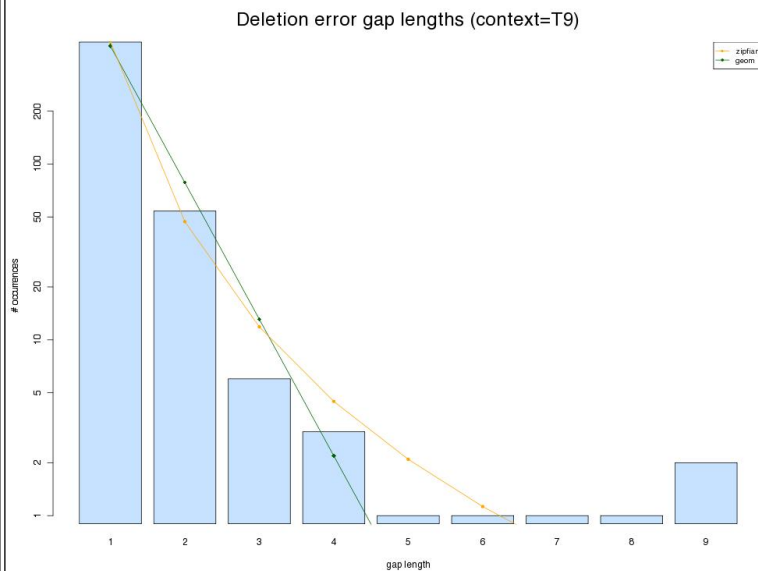

s = 3.3964052043  
 $X^2 = 16.3078188800407$   
 p-value = 0.0224481556328011

beta = 0.167159763313609  
 $X^2 = 14696.9523797269$   
 p-value = 0

A10

31

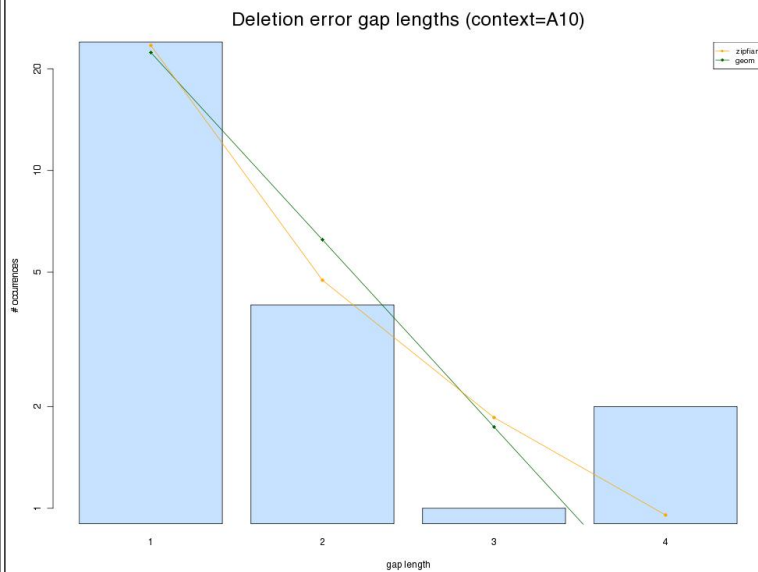

s = 2.30905454569390  
 $X^2 = 1.66397177236885$   
 p-value = 0.435184201332572

beta = 0.279069767441861  
 $X^2 = 5.96010988258343$   
 p-value = 0.0507900433176548

T10

87

s = 2.06543356561978  
 $X^2 = 18.2537902642195$   
 p-value = 0.0194022189545671

beta = 0.491228070175439  
 $X^2 = 98.3144949910199$   
 p-value = 9.43306790447387e-18

|                      |                                                                                                                                                                                                                                                                       |                                                                                                                        |                                                                                                                |
|----------------------|-----------------------------------------------------------------------------------------------------------------------------------------------------------------------------------------------------------------------------------------------------------------------|------------------------------------------------------------------------------------------------------------------------|----------------------------------------------------------------------------------------------------------------|
| <p>A11</p> <p>22</p> | <p>Deletion error gap lengths (context=T10)</p> 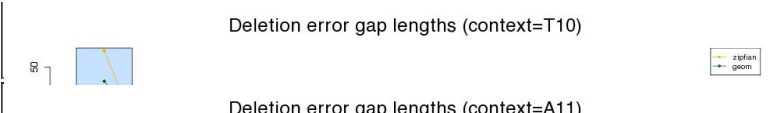 <p>Deletion error gap lengths (context=A11)</p>  | <p><math>s = 0.552331016783963</math></p> <p><math>X^2 = 2.87449044007541</math></p> <p>p-value = 0.9690636100729</p>  | <p>beta = 0.794392523364486</p> <p><math>X^2 = 9.67462916531639</math></p> <p>p-value = 0.377462119929868</p>  |
| <p>T11</p> <p>26</p> | <p>Deletion error gap lengths (context=T11)</p>                                                                                                                                    | <p><math>s = 1.99967253983709</math></p> <p><math>X^2 = 3.76959805998939</math></p> <p>p-value = 0.583041651292252</p> | <p>beta = 0.458333333333333</p> <p><math>X^2 = 13.9971376515854</math></p> <p>p-value = 0.0156276083406878</p> |
| <p>A12</p> <p>14</p> | <p>Deletion error gap lengths (context=A12)</p>                                                                                                                                   | <p><math>s = 1.19842587491795</math></p> <p><math>X^2 = 0.325326281349461</math></p> <p>p-value = 0.84987742933783</p> | <p>beta = 0.44</p> <p><math>X^2 = 0.4961960437394</math></p> <p>p-value = 0.780283454686194</p>                |

|                      |  |                                                                                                                        |                                                                                                                            |
|----------------------|--|------------------------------------------------------------------------------------------------------------------------|----------------------------------------------------------------------------------------------------------------------------|
| <p>T12</p> <p>25</p> |  | <p>s = 1.06023118132422<br/> <math>X^2 = 4.81844157250669</math><br/>                 p-value = 0.849839203471597</p>  | <p>beta = 0.739583333333333<br/> <math>X^2 = 16.1523816623622</math><br/>                 p-value = 0.0637668476621548</p> |
| <p>A13</p> <p>20</p> |  | <p>s = 1.04470658640519<br/> <math>X^2 = 0.956281509675145</math><br/>                 p-value = 0.916351088336651</p> | <p>beta = 0.591836734693878<br/> <math>X^2 = 4.18374006134246</math><br/>                 p-value = 0.381710071034104</p>  |
| <p>T13</p> <p>14</p> |  | <p>s = 1.30820790518368<br/> <math>X^2 = 0.825761971586434</math><br/>                 p-value = 0.661741034725801</p> | <p>beta = 0.44<br/> <math>X^2 = 2.89580352008832</math><br/>                 p-value = 0.235062989566924</p>               |

|     |    |                                                                                     |                                                                                                                        |                                                                                                                            |
|-----|----|-------------------------------------------------------------------------------------|------------------------------------------------------------------------------------------------------------------------|----------------------------------------------------------------------------------------------------------------------------|
|     |    | 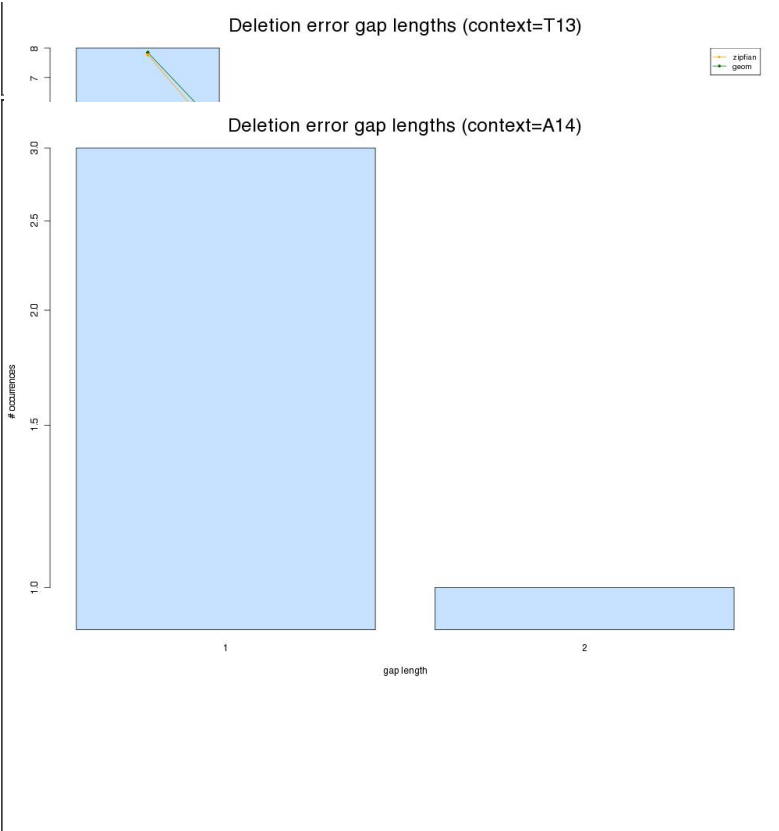  | INVALID/ERROR                                                                                                          | INVALID/ERROR                                                                                                              |
| T14 | 12 |  | <p>s = 1.29262575813854<br/> <math>X^2 = 2.25613272129751</math><br/>                 p-value = 0.133086042964734</p>  | <p>beta = 0.368421052631579<br/> <math>X^2 = 4.95121637856678</math><br/>                 p-value = 0.0260723183721473</p> |
| A15 | 11 |                                                                                     | <p>s = 0.243359866092211<br/> <math>X^2 = 0.884776682504825</math><br/>                 p-value = 0.97131395173215</p> | <p>beta = 0.73170731707317<br/> <math>X^2 = 5.99803332543462</math><br/>                 p-value = 0.306410331443849</p>   |

|                      |  |                                                                                                                          |                                                                                                               |
|----------------------|--|--------------------------------------------------------------------------------------------------------------------------|---------------------------------------------------------------------------------------------------------------|
| <p>T15</p> <p>3</p>  |  | <p>INVALID/ERROR</p>                                                                                                     | <p>INVALID/ERROR</p>                                                                                          |
| <p>A16</p> <p>12</p> |  | <p><math>s = 0.234428984065603</math></p> <p><math>X^2 = 1.21155639204441</math></p> <p>p-value = 0.99065837569117</p>   | <p>beta = 0.789473684210526</p> <p><math>X^2 = 8.10652266288131</math></p> <p>p-value = 0.323294687645877</p> |
| <p>T16</p> <p>6</p>  |  | <p><math>s = 0.122967886301763</math></p> <p><math>X^2 = 0.650635373179079</math></p> <p>p-value = 0.722297852847837</p> | <p>beta = 0.6</p> <p><math>X^2 = 4.45696790123457</math></p> <p>p-value = 0.107691572180377</p>               |



A17 8

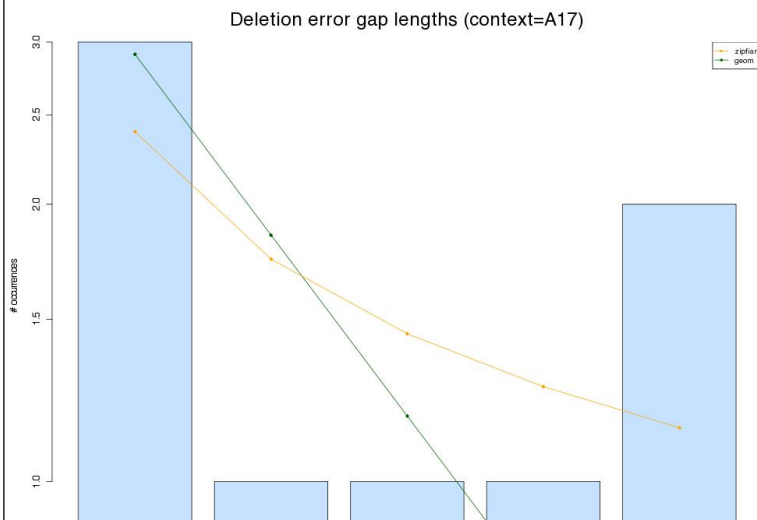

s = 0.459721443557304  
 $X^2 = 1.30317506141628$   
 p-value = 0.728379264884578

beta = 0.636363636363636  
 $X^2 = 5.36640432990757$   
 p-value = 0.146851087521449

T17 11

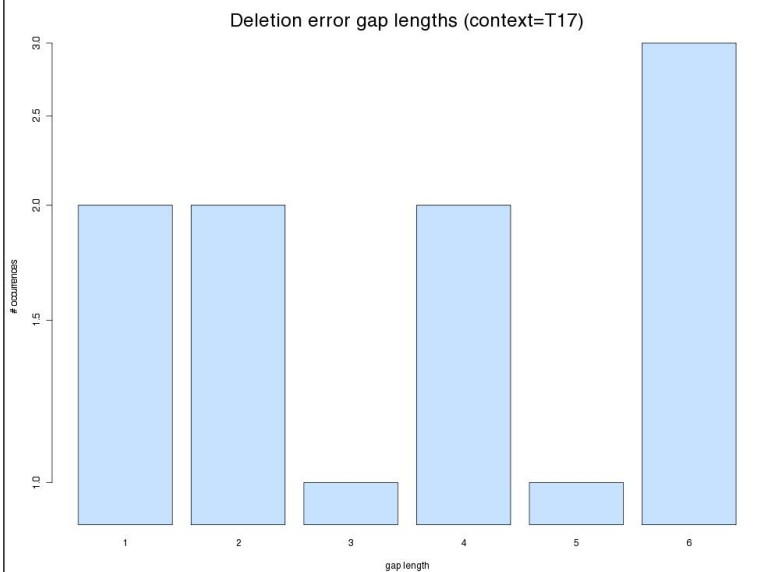

INVALID/ERROR

INVALID/ERROR

A18 6

s = 0.122967886301763  
 $X^2 = 0.650635373179079$

beta = 0.6  
 $X^2 = 4.45696790123457$

|     |    |                                                                                                                                     |                                                                                                  |                                                                                                      |
|-----|----|-------------------------------------------------------------------------------------------------------------------------------------|--------------------------------------------------------------------------------------------------|------------------------------------------------------------------------------------------------------|
|     |    | 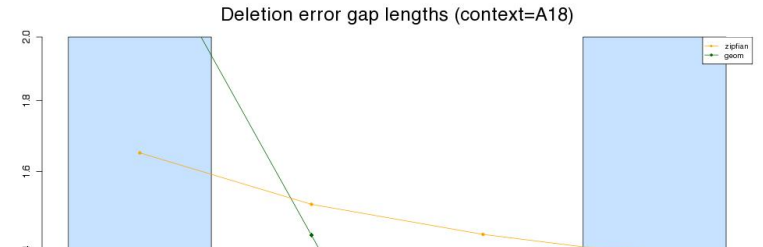 <p>Deletion error gap lengths (context=A18)</p>  | <p>p-value =<br/>0.722297852847837</p>                                                           | <p>p-value =<br/>0.107691572180377</p>                                                               |
| T18 | 2  |  <p>Deletion error gap lengths (context=T18)</p>  | <p>INVALID/ERROR</p>                                                                             | <p>INVALID/ERROR</p>                                                                                 |
| T19 | 13 |  <p>Deletion error gap lengths (context=T19)</p> | <p>s = 0.242575021243014<br/>X<sup>2</sup> = 2.31339813280911<br/>p-value = 0.94048125810666</p> | <p>beta = 0.793650793650794<br/>X<sup>2</sup> = 9.98070049857975<br/>p-value = 0.189669794087238</p> |
| A20 | 3  |                                                                                                                                     | <p>INVALID/ERROR</p>                                                                             | <p>INVALID/ERROR</p>                                                                                 |

|     |   |  |               |               |
|-----|---|--|---------------|---------------|
|     |   |  |               |               |
| T23 | 4 |  | INVALID/ERROR | INVALID/ERROR |
| A24 | 8 |  | INVALID/ERROR | INVALID/ERROR |

**Chi square statistics**

Deletion : chi square statistics

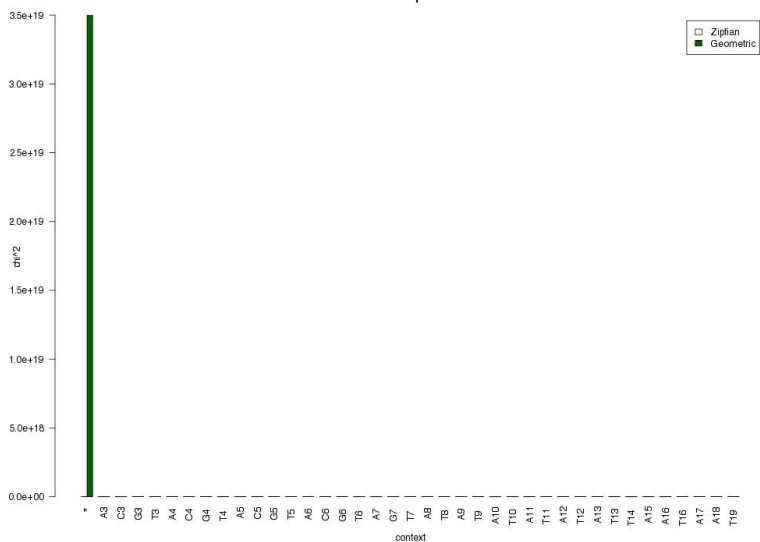

Deletion: chi square statistics

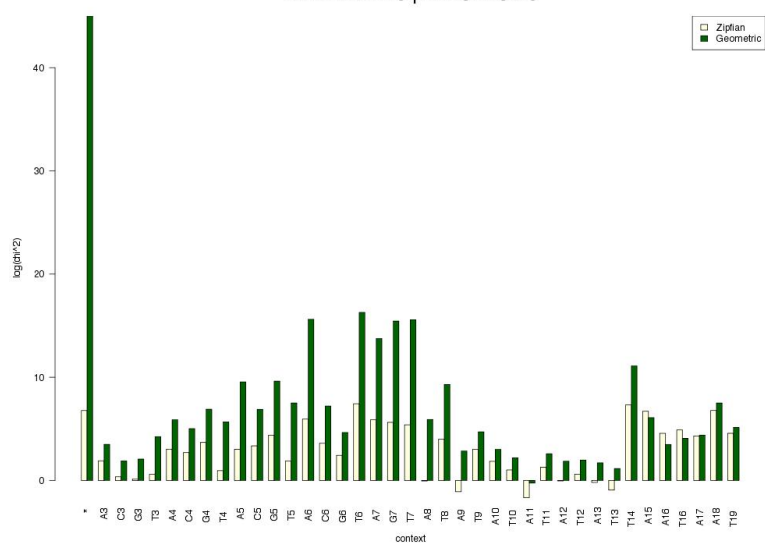

### Average Pearson's residuals

Deletion: Average Pearson residuals

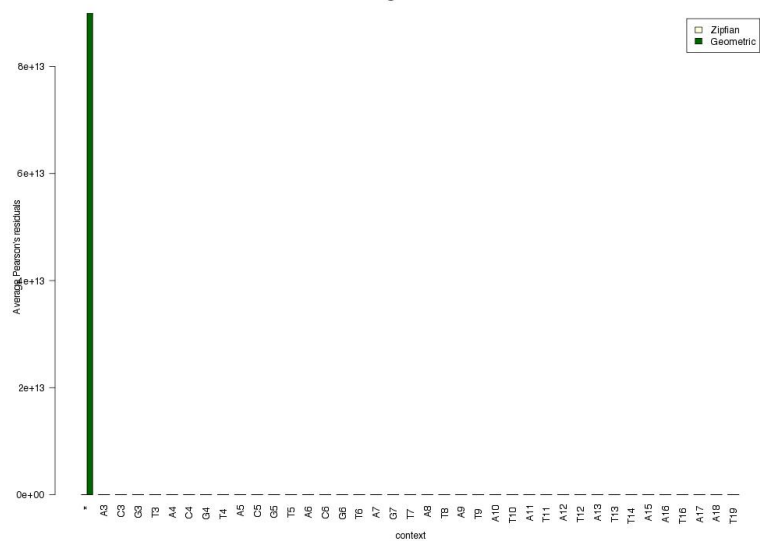

Deletion : Average Pearson residuals

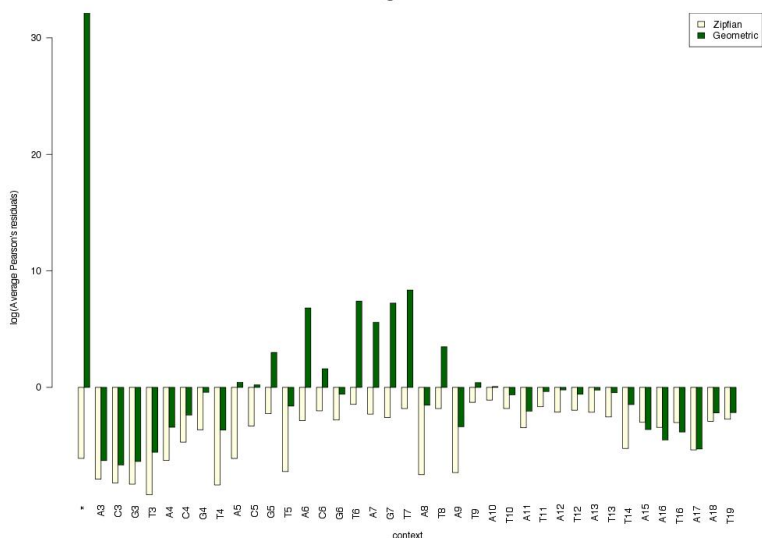

Deletion: Difference between average Pearson residuals

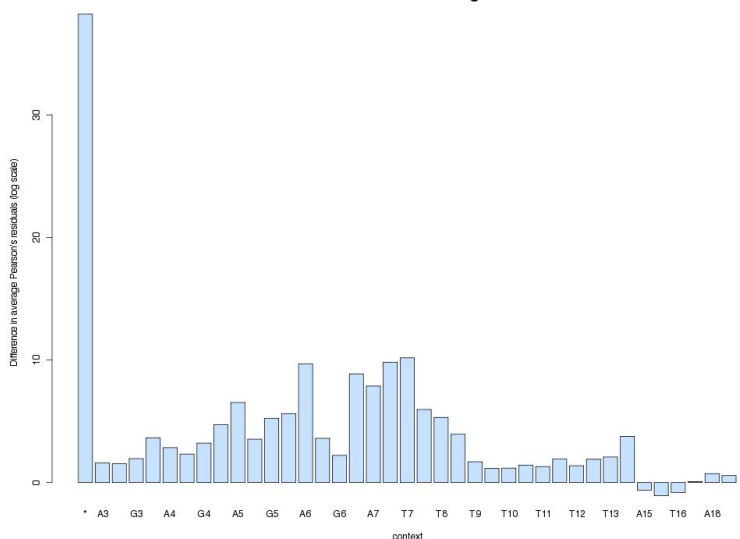

## Mann U Tests

Deletion : Mann-Whitney tests by context

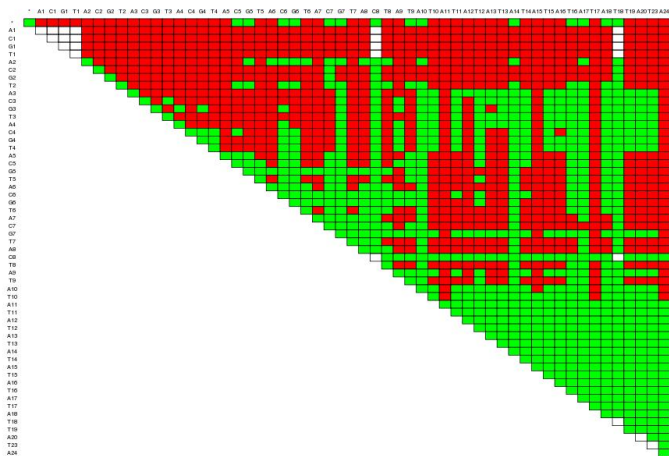

## Mann U Tests by context length

Deletion : Mann-Whitney tests by context length

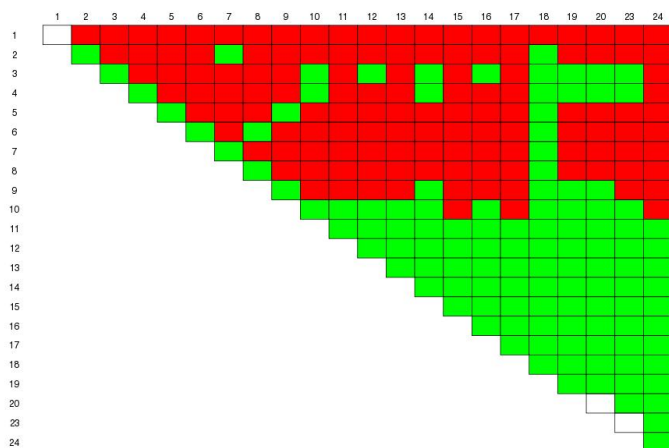

Supplement: 1756-0500-6-25-S3.pdf [file 1756-0500-6-25-S3.pdf]
