# Supplementary material for: Empirical assessment of sequencing errors for high throughput pyrosequencing data
Source: PubMed Central journal article supplement (PMC3852801; doi:10.1186/1756-0500-6-25), 2013-01-22
Supplement: 1756-0500-6-25-S2.pdf [file 1756-0500-6-25-S2.pdf]

# celera Matches

| HP base \ HP length | 1       | 2       | 3       | 4      | 5      | 6     | 7     | 8    | 9   | 10 | 11 | 12 | 13 | 14 | 15 | 16 | 17 | 18 | 19 | 20 | 21 | 22 |
|---------------------|---------|---------|---------|--------|--------|-------|-------|------|-----|----|----|----|----|----|----|----|----|----|----|----|----|----|
| A                   | 8266460 | 3097760 | 1128372 | 492925 | 215277 | 82702 | 26304 | 4552 | 651 | 79 | 38 | 24 | 15 | 12 | 16 | 5  | 1  | 1  | 3  | 0  | 0  | 1  |
| C                   | 7527051 | 1547142 | 217848  | 43078  | 6786   | 876   | 113   | 0    | 0   | 0  | 0  | 0  | 0  | 0  | 0  | 0  | 0  | 0  | 0  | 0  | 0  | NA |
| G                   | 7443144 | 1495949 | 212552  | 41896  | 6191   | 882   | 147   | 20   | 0   | 0  | 0  | 0  | 0  | 0  | 0  | 0  | 0  | 0  | 0  | 0  | 0  | NA |
| T                   | 8322275 | 3084911 | 1146793 | 502731 | 224735 | 89882 | 29349 | 5634 | 423 | 55 | 32 | 25 | 48 | 12 | 11 | 8  | 6  | 2  | 2  | 1  | 0  | NA |

Total HP matches: 45265873

Total match positions: 66248219

# celera Substitutions

|   | A                 | C                | G                | T                 |
|---|-------------------|------------------|------------------|-------------------|
| A | 0 ( 0 %)          | 314368 ( 9.48 %) | 298435 ( 9 %)    | 454647 ( 13.71 %) |
| C | 215248 ( 6.49 %)  | 0 ( 0 %)         | 155494 ( 4.69 %) | 220471 ( 6.65 %)  |
| G | 214762 ( 6.48 %)  | 155015 ( 4.67 %) | 0 ( 0 %)         | 214063 ( 6.46 %)  |
| T | 449989 ( 13.57 %) | 310634 ( 9.37 %) | 312819 ( 9.43 %) | 0 ( 0 %)          |

Total substitutions: 3315945

# celera Insertion

## Insertion per context

Insertion: number of gaps per context



Total: 708741

## Insertion per context

Insertion: percentage of gaps per context



| Context | #Data  | Gap lengths                                      | Zipfian fit                                                                                                                   | Geom fit                                                                                                       |
|---------|--------|--------------------------------------------------|-------------------------------------------------------------------------------------------------------------------------------|----------------------------------------------------------------------------------------------------------------|
| *       | 708741 | <p>Insertion error gap lengths (context=any)</p> | <p>s = 4.65175134225846<br/> <math>X^2 = 674.385812543933</math><br/>                     p-value = 1.69470235413899e-143</p> | <p>beta = 0.0530208184409083<br/> <math>X^2 = 12804.3549351305</math><br/>                     p-value = 0</p> |
| A1      | 113772 | <p>Insertion error gap lengths (context=A1)</p>  | INVALID/Error                                                                                                                 | INVALID/Error                                                                                                  |

|    |        |                                                                                                                                                                 |               |               |
|----|--------|-----------------------------------------------------------------------------------------------------------------------------------------------------------------|---------------|---------------|
| C1 | 72069  | <p style="text-align: center;">Insertion error gap lengths (context=C1)</p>   | INVALID/ERROR | INVALID/ERROR |
| G1 | 63614  | <p style="text-align: center;">Insertion error gap lengths (context=G1)</p>  | INVALID/ERROR | INVALID/ERROR |
| T1 | 116096 |                                                                                                                                                                 | INVALID/ERROR | INVALID/ERROR |

|    |       |  |               |               |
|----|-------|--|---------------|---------------|
|    |       |  |               |               |
| A2 | 68446 |  | INVALID/ERROR | INVALID/ERROR |
| C2 | 26389 |  | INVALID/ERROR | INVALID/ERROR |
|    |       |  |               |               |

|    |       |  |                                                                                                                                            |                                                                                                                                                  |
|----|-------|--|--------------------------------------------------------------------------------------------------------------------------------------------|--------------------------------------------------------------------------------------------------------------------------------------------------|
| G2 | 24184 |  | INVALID/ERROR                                                                                                                              | INVALID/ERROR                                                                                                                                    |
| T2 | 68146 |  | INVALID/ERROR                                                                                                                              | INVALID/ERROR                                                                                                                                    |
| A3 | 29213 |  | <p> <math>s = 3.06237840832514</math><br/> <math>X^2 = 61.671294560715</math><br/> <math>p\text{-value} = 4.05854092363824e-15</math> </p> | <p> <math>\beta = 0.138767688679245</math><br/> <math>X^2 = 104.589672335044</math><br/> <math>p\text{-value} = 1.50237857823962e-24</math> </p> |
|    |       |  |                                                                                                                                            |                                                                                                                                                  |

|    |       |                                                 |                                                                                                                              |                                                                                                                                  |
|----|-------|-------------------------------------------------|------------------------------------------------------------------------------------------------------------------------------|----------------------------------------------------------------------------------------------------------------------------------|
| C3 | 6007  | <p>Insertion error gap lengths (context=C3)</p> | <p>s = 1.93399959970195<br/> <math>X^2 = 2.1480204135818</math><br/>                     p-value = 0.142753845472073</p>     | <p>beta = 0.26519877675841<br/> <math>X^2 = 113.508507577056</math><br/>                     p-value = 1.66963420626503e-26</p>  |
| G3 | 5805  | <p>Insertion error gap lengths (context=G3)</p> | <p>s = 2.04713324252887<br/> <math>X^2 = 1.12952914792824</math><br/>                     p-value = 0.28787579475601</p>     | <p>beta = 0.250967741935484<br/> <math>X^2 = 100.664699511723</math><br/>                     p-value = 1.08950108883066e-23</p> |
| T3 | 28987 | <p>Insertion error gap lengths (context=T3)</p> | <p>s = 3.12791393067888<br/> <math>X^2 = 291.525619548521</math><br/>                     p-value = 2.31281332334304e-65</p> | <p>beta = 0.130876709042936<br/> <math>X^2 = 11.1617662576153</math><br/>                     p-value = 0.000835003877040266</p> |

|    |       |                                                 |                                                                                                                              |                                                                                                                                   |
|----|-------|-------------------------------------------------|------------------------------------------------------------------------------------------------------------------------------|-----------------------------------------------------------------------------------------------------------------------------------|
| A4 | 15518 | <p>Insertion error gap lengths (context=A4)</p> | <p>s = 3.2224395792105<br/> <math>X^2 = 53.2356871606835</math><br/>                     p-value = 2.75433913544143e-12</p>  | <p>beta = 0.150257365020261<br/> <math>X^2 = 674.475514779563</math><br/>                     p-value = 3.46340178298326e-147</p> |
| C4 | 2035  | <p>Insertion error gap lengths (context=C4)</p> | <p>s = 1.88205039535727<br/> <math>X^2 = 157.599674325211</math><br/>                     p-value = 5.99329348865111e-35</p> | <p>beta = 0.341849935316947<br/> <math>X^2 = 265.503174860792</math><br/>                     p-value = 2.22186728843846e-58</p>  |
| G4 | 1790  | <p>Insertion error gap lengths (context=G4)</p> | <p>s = 2.00917566951851<br/> <math>X^2 = 188.053213499704</math><br/>                     p-value = 1.46138126866772e-41</p> | <p>beta = 0.320940819423369<br/> <math>X^2 = 281.551127402893</math><br/>                     p-value = 7.27695178872066e-62</p>  |

|    |       |                                                                             |                                                                                                                                             |                                                                                                                                                   |
|----|-------|-----------------------------------------------------------------------------|---------------------------------------------------------------------------------------------------------------------------------------------|---------------------------------------------------------------------------------------------------------------------------------------------------|
|    |       |                                                                             |                                                                                                                                             |                                                                                                                                                   |
| T4 | 15430 | <p style="text-align: center;">Insertion error gap lengths (context=T4)</p> | <p> <math>s = 3.28034822018251</math><br/> <math>X^2 = 72.6997252667011</math><br/> <math>p\text{-value} = 1.63476465902417e-16</math> </p> | <p> <math>\beta = 0.142253599421869</math><br/> <math>X^2 = 460.690303241429</math><br/> <math>p\text{-value} = 9.17005030140118e-101</math> </p> |
| A5 | 10842 | <p style="text-align: center;">Insertion error gap lengths (context=A5)</p> | <p> <math>s = 3.77476284629817</math><br/> <math>X^2 = 111.837818667721</math><br/> <math>p\text{-value} = 4.41360141639958e-24</math> </p> | <p> <math>\beta = 0.112330112985099</math><br/> <math>X^2 = 1747.64936377591</math><br/> <math>p\text{-value} = 0</math> </p>                     |
| C5 | 708   |                                                                             | <p> <math>s = 4.45616172991951</math><br/> <math>X^2 = 28.5552989337661</math><br/> <math>p\text{-value} = 2.77689349096759e-06</math> </p> | <p> <math>\beta = 0.072083879423329</math><br/> <math>X^2 = 616.653919890878</math><br/> <math>p\text{-value} = 2.4715309546673e-133</math> </p>  |

|    |       |                                                 |                                                                                                                          |                                                                                                                               |
|----|-------|-------------------------------------------------|--------------------------------------------------------------------------------------------------------------------------|-------------------------------------------------------------------------------------------------------------------------------|
|    |       | <p>Insertion error gap lengths (context=C5)</p> |                                                                                                                          |                                                                                                                               |
| G5 | 597   | <p>Insertion error gap lengths (context=G5)</p> | <p>s = 4.430144643528<br/> <math>X^2 = 15.7950257056116</math><br/>                 p-value = 0.00124915403237366</p>    | <p>beta = 0.0715396578538103<br/> <math>X^2 = 358.769367985303</math><br/>                 p-value = 1.88267273876526e-77</p> |
| T5 | 10593 | <p>Insertion error gap lengths (context=T5)</p> | <p>s = 3.85523658278546<br/> <math>X^2 = 62.1534232073567</math><br/>                 p-value = 2.03729708512252e-13</p> | <p>beta = 0.103048264182896<br/> <math>X^2 = 1065.64902268110</math><br/>                 p-value = 1.03135701472478e-230</p> |
| A6 | 7311  | <p>Insertion error gap lengths (context=A6)</p> | <p>s = 4.44310277230933<br/> <math>X^2 = 131.050922936449</math><br/>                 p-value = 2.32082052151719e-27</p> | <p>beta = 0.0718547670432905<br/> <math>X^2 = 16713.6120500416</math><br/>                 p-value = 0</p>                    |

C6

187



s = 4.45512825633852  
 $X^2 = 29.9039486651916$   
 p-value = 1.44577384723127e-06

beta = 0.0788177339901477  
 $X^2 = 616.235321544838$   
 p-value = 3.04590638807809e-133

G6

173



s = 4.94251324927962  
 $X^2 = 0.132239959010237$   
 p-value = 0.716120784842232

beta = 0.0388888888888889  
 $X^2 = 2.56384023901651$   
 p-value = 0.109332711894606

T6

7491



s = 4.44661966316207 beta =  
 $X^2 = 0.0664257228315055$   
 $X^2 = 17.2388587721820$   
 $X^2 = 2289.34317502254$   
p-value = 0.00173691550252098 p-value = 0

A7

3992



s = 4.6230496813618 beta =  
 $X^2 = 0.0602636534839925$   
 $X^2 = 20.2102571511940$   
 $X^2 = 25938.605550418$   
p-value = 0.00114112090348972 p-value = 0

C7

29

s = 3.34180521073645 beta =  
 $X^2 = 0.121212121212121$   
 $X^2 = 0.298006762708835$   
 $X^2 = 1.43951042553098$   
p-value = 0.585134708143864 p-value = 0.230218580655573

|    |      |                                                 |                                                                                                                                 |                                                                                                                   |
|----|------|-------------------------------------------------|---------------------------------------------------------------------------------------------------------------------------------|-------------------------------------------------------------------------------------------------------------------|
|    |      | <p>Insertion error gap lengths (context=C7)</p> |                                                                                                                                 |                                                                                                                   |
| G7 | 49   | <p>Insertion error gap lengths (context=G7)</p> | INVALID/ERROR                                                                                                                   | INVALID/ERROR                                                                                                     |
| T7 | 4207 | <p>Insertion error gap lengths (context=T7)</p> | <p>s = 4.67034879362842<br/> <math>\chi^2 = 33.8752150944833</math><br/>                     p-value = 2.52114795902883e-06</p> | <p>beta = 0.0582046115961496<br/> <math>\chi^2 = 28230.3327213344</math><br/>                     p-value = 0</p> |
| A8 | 1915 |                                                 | <p>s = 4.44753422931875<br/> <math>\chi^2 = 32.4318849806104</math><br/>                     p-value =</p>                      | <p>beta = 0.068579766536965<br/> <math>\chi^2 = 9308.99831740176</math></p>                                       |

|    |      |                                                 |                                                                                                                              |                                                                                                                |
|----|------|-------------------------------------------------|------------------------------------------------------------------------------------------------------------------------------|----------------------------------------------------------------------------------------------------------------|
|    |      | <p>Insertion error gap lengths (context=A8)</p> | 1.56112062253713e-06                                                                                                         | p-value = 0                                                                                                    |
| C8 | 8    | <p>Insertion error gap lengths (context=C8)</p> | INVALID/ERROR                                                                                                                | INVALID/ERROR                                                                                                  |
| G8 | 4    | <p>Insertion error gap lengths (context=G8)</p> | INVALID/ERROR                                                                                                                | INVALID/ERROR                                                                                                  |
| T8 | 1963 |                                                 | <p>s = 4.92716876436796<br/> <math>X^2 = 21.6197380242169</math><br/>                     p-value = 7.82615666992692e-05</p> | <p>beta = 0.0466245750364255<br/> <math>X^2 = 1904.36463633256</math><br/>                     p-value = 0</p> |

|    |     |                                                 |                                                                                                                         |                                                                                                                              |
|----|-----|-------------------------------------------------|-------------------------------------------------------------------------------------------------------------------------|------------------------------------------------------------------------------------------------------------------------------|
|    |     | <p>Insertion error gap lengths (context=T8)</p> |                                                                                                                         |                                                                                                                              |
| A9 | 455 | <p>Insertion error gap lengths (context=A9)</p> | <p>s = 3.28965023224829<br/> <math>X^2 = 11.3449805940114</math><br/>                 p-value = 0.00999947376720258</p> | <p>beta = 0.144736842105263<br/> <math>X^2 = 20.8501623746965</math><br/>                 p-value = 0.000113094844877843</p> |
| T9 | 511 | <p>Insertion error gap lengths (context=T9)</p> | <p>s = 3.42958185392897<br/> <math>X^2 = 9.01779567543008</math><br/>                 p-value = 0.0606562096394217</p>  | <p>beta = 0.139730639730640<br/> <math>X^2 = 172.814008955156</math><br/>                 p-value = 2.60292104286128e-36</p> |
|    |     |                                                 | <p>s = 2.60414587794029</p>                                                                                             | <p>beta = 0.179245283018868</p>                                                                                              |

|     |    |                                                  |                                                                                                                                               |                                                                                                                                                         |
|-----|----|--------------------------------------------------|-----------------------------------------------------------------------------------------------------------------------------------------------|---------------------------------------------------------------------------------------------------------------------------------------------------------|
| A10 | 87 | <p>Insertion error gap lengths (context=A10)</p> | <p><math>X^2 =</math><br/>1.99983304510768<br/><math>p\text{-value} =</math><br/>0.157316534191975</p>                                        | <p><math>X^2 =</math><br/>0.443845019349308<br/><math>p\text{-value} =</math><br/>0.50527244279888</p>                                                  |
| T10 | 63 | <p>Insertion error gap lengths (context=T10)</p> | <p><math>s = 1.78575676709675</math><br/><math>X^2 =</math><br/>9.8635245654481<br/><math>p\text{-value} =</math><br/>0.00168587821988241</p> | <p><math>\beta =</math><br/>0.267441860465116<br/><math>X^2 =</math><br/>8.25107870865707<br/><math>p\text{-value} =</math><br/>0.00407277911147701</p> |
| A11 | 15 | <p>Insertion error gap lengths (context=A11)</p> | <p>INVALID/ERROR</p>                                                                                                                          | <p>INVALID/ERROR</p>                                                                                                                                    |
| T11 | 15 |                                                  | <p><math>s = 1.55940140162786</math><br/><math>X^2 =</math><br/>0.0653636910769776</p>                                                        | <p><math>\beta =</math><br/>0.318181818181818<br/><math>X^2 =</math><br/>0.923522686810764</p>                                                          |

|     |   |  |                                        |                                        |
|-----|---|--|----------------------------------------|----------------------------------------|
|     |   |  | <p>p-value =<br/>0.798210884026135</p> | <p>p-value =<br/>0.336551726558229</p> |
| A12 | 3 |  | INVALID/ERROR                          | INVALID/ERROR                          |
| T12 | 2 |  | INVALID/ERROR                          | INVALID/ERROR                          |
| A13 | 3 |  | INVALID/ERROR                          | INVALID/ERROR                          |

|     |   |                                                  |               |               |
|-----|---|--------------------------------------------------|---------------|---------------|
|     |   | <p>Insertion error gap lengths (context=A13)</p> |               |               |
| T13 | 6 | <p>Insertion error gap lengths (context=T13)</p> | INVALID/ERROR | INVALID/ERROR |
| A14 | 4 | <p>Insertion error gap lengths (context=A14)</p> | INVALID/ERROR | INVALID/ERROR |
|     |   |                                                  |               |               |

|     |    |                                                  |                                                                                                                          |                                                                                                                               |
|-----|----|--------------------------------------------------|--------------------------------------------------------------------------------------------------------------------------|-------------------------------------------------------------------------------------------------------------------------------|
| T14 | 13 | <p>Insertion error gap lengths (context=T14)</p> | <p>s = 1.96211565844555<br/> <math>\chi^2 = 1.61472193705244</math><br/>                 p-value = 0.203829311490968</p> | <p>beta = 0.277777777777778<br/> <math>\chi^2 = 3.27710452837233</math><br/>                 p-value = 0.0702527686666703</p> |
| A15 | 1  | <p>Insertion error gap lengths (context=A15)</p> | INVALID/ERROR                                                                                                            | INVALID/ERROR                                                                                                                 |
| T15 | 7  | <p>Insertion error gap lengths (context=T15)</p> | INVALID/ERROR                                                                                                            | INVALID/ERROR                                                                                                                 |
|     |    |                                                  |                                                                                                                          |                                                                                                                               |

|                     |  |                                                                                                                                       |                      |                      |
|---------------------|--|---------------------------------------------------------------------------------------------------------------------------------------|----------------------|----------------------|
| <p>A16</p> <p>4</p> |  | <p>Insertion error gap lengths (context=A16)</p>    | <p>INVALID/ERROR</p> | <p>INVALID/ERROR</p> |
| <p>A17</p> <p>1</p> |  | <p>Insertion error gap lengths (context=A17)</p>   | <p>INVALID/ERROR</p> | <p>INVALID/ERROR</p> |
| <p>T17</p> <p>2</p> |  | <p>Insertion error gap lengths (context=T17)</p>  | <p>INVALID/ERROR</p> | <p>INVALID/ERROR</p> |

A18

5



s =  
 0.0926542887493549  
 $X^2 =$   
 0.395050902693468  
 p-value =  
 0.52965630969129

beta = 0.5  
 $X^2 = 3.175$   
 p-value =  
 0.0747732118999497

T18

1



INVALID/ERROR

INVALID/ERROR

# Chi square statistics



# Average Pearson's residuals

Insertion: Average Pearson residuals



Insertion : Average Pearson residuals



Insertion: Difference between average Pearson residuals



## Mann U Tests

Insertion : Mann-Whitney tests by context



## Mann U Tests by context length

Insertion : Mann-Whitney tests by context length



## celera Deletion

### Deletion per context

Deletion: number of gaps per context



Total: 269326

### Deletion per context

Deletion: percentage of gaps per context



| Context | #Data  | Gap lengths                                     | Zipfian fit                                                                                                                  | Geom fit                                                                                                       |
|---------|--------|-------------------------------------------------|------------------------------------------------------------------------------------------------------------------------------|----------------------------------------------------------------------------------------------------------------|
| *       | 269326 | <p>Deletion error gap lengths (context=any)</p> | <p>s = 4.13157135099768<br/> <math>X^2 = 876.48171340316</math><br/>                     p-value = 2.07547219665432e-188</p> | <p>beta = 0.0786225488183696<br/> <math>X^2 = 2425.60061768410</math><br/>                     p-value = 0</p> |

|    |       |                                                                                                                                                                |               |               |
|----|-------|----------------------------------------------------------------------------------------------------------------------------------------------------------------|---------------|---------------|
| A1 | 11606 | <p style="text-align: center;">Deletion error gap lengths (context=A1)</p>   | INVALID/ERROR | INVALID/ERROR |
| C1 | 3041  | <p style="text-align: center;">Deletion error gap lengths (context=C1)</p>  | INVALID/ERROR | INVALID/ERROR |
| G1 | 5604  |                                                                                                                                                                | INVALID/ERROR | INVALID/ERROR |

|    |       |                                                                                                                                    |               |               |
|----|-------|------------------------------------------------------------------------------------------------------------------------------------|---------------|---------------|
|    |       | <p>Deletion error gap lengths (context=G1)</p>   |               |               |
| T1 | 9675  | <p>Deletion error gap lengths (context=T1)</p>   | INVALID/ERROR | INVALID/ERROR |
| A2 | 38216 | <p>Deletion error gap lengths (context=A2)</p>  | INVALID/ERROR | INVALID/ERROR |
| C2 | 13068 |                                                                                                                                    | INVALID/ERROR | INVALID/ERROR |

|    |       |  |                                                                            |                                                                                       |
|----|-------|--|----------------------------------------------------------------------------|---------------------------------------------------------------------------------------|
|    |       |  |                                                                            |                                                                                       |
| G2 | 13276 |  | INVALID/ERROR                                                              | INVALID/ERROR                                                                         |
| T2 | 36333 |  | INVALID/ERROR                                                              | INVALID/ERROR                                                                         |
| A3 | 19009 |  | $s = 2.24413574843526$<br>$X^2 = 2323.32907621064$<br>$p\text{-value} = 0$ | $\text{beta} = 0.211342986350247$<br>$X^2 = 1674.19447134317$<br>$p\text{-value} = 0$ |

|    |      |                                                |                                                                                                                                             |                                                                                                                                                  |
|----|------|------------------------------------------------|---------------------------------------------------------------------------------------------------------------------------------------------|--------------------------------------------------------------------------------------------------------------------------------------------------|
| C3 | 2519 | <p>Deletion error gap lengths (context=C3)</p> | <p> <math>s = 2.87834920639417</math><br/> <math>X^2 = 155.471383421793</math><br/> <math>p\text{-value} = 1.10454400621024e-35</math> </p> | <p> <math>\beta = 0.147257955314827</math><br/> <math>X^2 = 86.0369680562996</math><br/> <math>p\text{-value} = 1.76603135663117e-20</math> </p> |
| G3 | 2545 | <p>Deletion error gap lengths (context=G3)</p> | <p> <math>s = 2.86066989641126</math><br/> <math>X^2 = 160.539419581068</math><br/> <math>p\text{-value} = 8.6256703808739e-37</math> </p>  | <p> <math>\beta = 0.148829431438127</math><br/> <math>X^2 = 89.6002642080527</math><br/> <math>p\text{-value} = 2.91485238963088e-21</math> </p> |

|    |       |                                                |                                                                                                                           |                                                                                                                              |
|----|-------|------------------------------------------------|---------------------------------------------------------------------------------------------------------------------------|------------------------------------------------------------------------------------------------------------------------------|
| T3 | 19445 | <p>Deletion error gap lengths (context=T3)</p> | <p>s = 2.1715068127237<br/> <math>X^2 = 2591.6692420927</math><br/>                 p-value = 0</p>                       | <p>beta = 0.219452472703918<br/> <math>X^2 = 1935.16470101859</math><br/>                 p-value = 0</p>                    |
| A4 | 13733 | <p>Deletion error gap lengths (context=A4)</p> | <p>s = 2.88299141271325<br/> <math>X^2 = 1029.62636915895</math><br/>                 p-value = 2.62708863775782e-224</p> | <p>beta = 0.18821304013714<br/> <math>X^2 = 1687.72528790234</math><br/>                 p-value = 0</p>                     |
| C4 | 1045  | <p>Deletion error gap lengths (context=C4)</p> | <p>s = 3.35282259148414<br/> <math>X^2 = 27.1891937145432</math><br/>                 p-value = 1.84486960908434e-07</p>  | <p>beta = 0.122586062132662<br/> <math>X^2 = 87.0876823621803</math><br/>                 p-value = 1.03815101999855e-20</p> |

|    |       |                                                |                                                                                                           |                                                                                                            |
|----|-------|------------------------------------------------|-----------------------------------------------------------------------------------------------------------|------------------------------------------------------------------------------------------------------------|
| G4 | 1015  | <p>Deletion error gap lengths (context=G4)</p> | <p>s = 3.08199505097195<br/> <math>X^2 = 13.3740690593095</math><br/> p-value = 0.000255127233213948</p>  | <p>beta = 0.143459915611814<br/> <math>X^2 = 57.59257234837</math><br/> p-value = 3.22440911336048e-14</p> |
| T4 | 14640 | <p>Deletion error gap lengths (context=T4)</p> | <p>s = 2.90145274416573<br/> <math>X^2 = 1058.15945797622</math><br/> p-value = 1.67337475802733e-230</p> | <p>beta = 0.185852519185853<br/> <math>X^2 = 1752.54435536755</math><br/> p-value = 0</p>                  |
| A5 | 12889 | <p>Deletion error gap lengths (context=A5)</p> | <p>s = 4.35875597991466<br/> <math>X^2 = 205.867336482474</math><br/> p-value = 1.97913710368347e-45</p>  | <p>beta = 0.0693862815884476<br/> <math>X^2 = 2040.7030351961</math><br/> p-value = 0</p>                  |

| C5         | 398           | <p style="text-align: center;">Deletion error gap lengths (context=C5)</p> <table border="1"> <caption>Observed Deletion Error Gap Lengths for Context C5</caption> <thead> <tr> <th>gap length</th> <th># occurrences</th> </tr> </thead> <tbody> <tr> <td>1</td> <td>~200</td> </tr> <tr> <td>2</td> <td>~80</td> </tr> <tr> <td>3</td> <td>~70</td> </tr> <tr> <td>4</td> <td>~10</td> </tr> </tbody> </table>  | gap length | # occurrences | 1 | ~200 | 2 | ~80  | 3 | ~70 | 4 | ~10 | <p> <math>s = 4.23086502491977</math><br/> <math>X^2 = 15.0385702155633</math><br/> <math>p\text{-value} = 0.000542520270765359</math> </p> | <p> <math>\beta = 0.0787037037037037</math><br/> <math>X^2 = 72.9902256491336</math><br/> <math>p\text{-value} = 1.41375412093137e-16</math> </p> |
|------------|---------------|--------------------------------------------------------------------------------------------------------------------------------------------------------------------------------------------------------------------------------------------------------------------------------------------------------------------------------------------------------------------------------------------------------------------|------------|---------------|---|------|---|------|---|-----|---|-----|---------------------------------------------------------------------------------------------------------------------------------------------|---------------------------------------------------------------------------------------------------------------------------------------------------|
| gap length | # occurrences |                                                                                                                                                                                                                                                                                                                                                                                                                    |            |               |   |      |   |      |   |     |   |     |                                                                                                                                             |                                                                                                                                                   |
| 1          | ~200          |                                                                                                                                                                                                                                                                                                                                                                                                                    |            |               |   |      |   |      |   |     |   |     |                                                                                                                                             |                                                                                                                                                   |
| 2          | ~80           |                                                                                                                                                                                                                                                                                                                                                                                                                    |            |               |   |      |   |      |   |     |   |     |                                                                                                                                             |                                                                                                                                                   |
| 3          | ~70           |                                                                                                                                                                                                                                                                                                                                                                                                                    |            |               |   |      |   |      |   |     |   |     |                                                                                                                                             |                                                                                                                                                   |
| 4          | ~10           |                                                                                                                                                                                                                                                                                                                                                                                                                    |            |               |   |      |   |      |   |     |   |     |                                                                                                                                             |                                                                                                                                                   |
| G5         | 401           | <p style="text-align: center;">Deletion error gap lengths (context=G5)</p> <table border="1"> <caption>Observed Deletion Error Gap Lengths for Context G5</caption> <thead> <tr> <th>gap length</th> <th># occurrences</th> </tr> </thead> <tbody> <tr> <td>1</td> <td>~200</td> </tr> <tr> <td>2</td> <td>~150</td> </tr> <tr> <td>3</td> <td>~60</td> </tr> <tr> <td>4</td> <td>~10</td> </tr> </tbody> </table> | gap length | # occurrences | 1 | ~200 | 2 | ~150 | 3 | ~60 | 4 | ~10 | <p> <math>s = 4.15850895201487</math><br/> <math>X^2 = 6.33235852506228</math><br/> <math>p\text{-value} = 0.0421643895996077</math> </p>   | <p> <math>\beta = 0.0802752293577982</math><br/> <math>X^2 = 55.3435408481379</math><br/> <math>p\text{-value} = 9.60069781460717e-13</math> </p> |
| gap length | # occurrences |                                                                                                                                                                                                                                                                                                                                                                                                                    |            |               |   |      |   |      |   |     |   |     |                                                                                                                                             |                                                                                                                                                   |
| 1          | ~200          |                                                                                                                                                                                                                                                                                                                                                                                                                    |            |               |   |      |   |      |   |     |   |     |                                                                                                                                             |                                                                                                                                                   |
| 2          | ~150          |                                                                                                                                                                                                                                                                                                                                                                                                                    |            |               |   |      |   |      |   |     |   |     |                                                                                                                                             |                                                                                                                                                   |
| 3          | ~60           |                                                                                                                                                                                                                                                                                                                                                                                                                    |            |               |   |      |   |      |   |     |   |     |                                                                                                                                             |                                                                                                                                                   |
| 4          | ~10           |                                                                                                                                                                                                                                                                                                                                                                                                                    |            |               |   |      |   |      |   |     |   |     |                                                                                                                                             |                                                                                                                                                   |
|            |               |                                                                                                                                                                                                                                                                                                                                                                                                                    |            |               |   |      |   |      |   |     |   |     |                                                                                                                                             |                                                                                                                                                   |

|    |       |                                                |                                                                                                         |                                                                                            |
|----|-------|------------------------------------------------|---------------------------------------------------------------------------------------------------------|--------------------------------------------------------------------------------------------|
| T5 | 13408 | <p>Deletion error gap lengths (context=T5)</p> | <p>s = 4.15637340105945<br/> <math>X^2 = 496.502775669279</math><br/> p-value = 1.533882662343e-108</p> | <p>beta = 0.0833390305599234<br/> <math>X^2 = 3522.86368954971</math><br/> p-value = 0</p> |
| A6 | 9772  | <p>Deletion error gap lengths (context=A6)</p> | <p>s = 5.0920133118168<br/> <math>X^2 = 195.401106363212</math><br/> p-value = 4.15717406593749e-42</p> | <p>beta = 0.0427115987460814<br/> <math>X^2 = 12599.4554246289</math><br/> p-value = 0</p> |
| C6 | 92    | <p>Deletion error gap lengths (context=C6)</p> | <p>INVALID/ERROR</p>                                                                                    | <p>INVALID/ERROR</p>                                                                       |

G6

119



s = 3.60558117814859  
 $\chi^2 = 14.1760177094006$   
 p-value = 0.00267509414132328

beta = 0.143884892086331  
 $\chi^2 = 106.113944017656$   
 p-value = 7.52510381474963e-23

T6

10658



s = 5.19894811245341  
 $\chi^2 = 177.283716591884$   
 p-value = 3.40434745364146e-38

beta = 0.039040663601118  
 $\chi^2 = 8921.56044567832$   
 p-value = 0

|           |             |                                                |                                                                                                                                                      |                                                                                                                                                                           |
|-----------|-------------|------------------------------------------------|------------------------------------------------------------------------------------------------------------------------------------------------------|---------------------------------------------------------------------------------------------------------------------------------------------------------------------------|
| <p>A7</p> | <p>5824</p> | <p>Deletion error gap lengths (context=A7)</p> | <p>s = 5.6024155163407<br/> <math>X^2 =</math><br/>             80.838019148863<br/>             p-value =<br/>             1.15730248994697e-16</p> | <p>beta =<br/>             0.0285237698081734<br/> <math>X^2 =</math><br/>             19897.8293578799<br/>             p-value = 0</p>                                  |
| <p>C7</p> | <p>41</p>   | <p>Deletion error gap lengths (context=C7)</p> | <p>s = 3.8157874138771<br/> <math>X^2 =</math><br/>             0.497688405074037<br/>             p-value =<br/>             0.48051758162324</p>   | <p>beta =<br/>             0.0888888888888889<br/> <math>X^2 =</math><br/>             2.21945691783175<br/>             p-value =<br/>             0.136280990779991</p> |
| <p>G7</p> | <p>18</p>   | <p>Deletion error gap lengths (context=G7)</p> | <p>INVALID/Error</p>                                                                                                                                 | <p>INVALID/Error</p>                                                                                                                                                      |

|           |             |                                                |                                                                                                                         |                                                                                                                             |
|-----------|-------------|------------------------------------------------|-------------------------------------------------------------------------------------------------------------------------|-----------------------------------------------------------------------------------------------------------------------------|
| <p>T7</p> | <p>6622</p> | <p>Deletion error gap lengths (context=T7)</p> | <p>s = 5.42474147793132<br/> <math>X^2 = 193.190455410606</math><br/>                 p-value = 1.0930856956806e-40</p> | <p>beta = 0.0338488473883863<br/> <math>X^2 = 229758.024192909</math><br/>                 p-value = 0</p>                  |
| <p>A8</p> | <p>1660</p> | <p>Deletion error gap lengths (context=A8)</p> | <p>s = 4.87703260154272<br/> <math>X^2 = 1.83029513787374</math><br/>                 p-value = 0.400457526638837</p>   | <p>beta = 0.0421234852856318<br/> <math>X^2 = 8.95218804597476</math><br/>                 p-value = 0.0113777677735931</p> |
| <p>G8</p> | <p>4</p>    | <p>Deletion error gap lengths (context=G8)</p> | <p>INVALID/ERROR</p>                                                                                                    | <p>INVALID/ERROR</p>                                                                                                        |

|    |      |                                                |                                                                                                                          |                                                                                                                                  |
|----|------|------------------------------------------------|--------------------------------------------------------------------------------------------------------------------------|----------------------------------------------------------------------------------------------------------------------------------|
| T8 | 2072 | <p>Deletion error gap lengths (context=T8)</p> | <p>s = 4.68087274969306<br/> <math>\chi^2 = 9.6202236050093</math><br/>                 p-value = 0.0220861854440816</p> | <p>beta = 0.053016453382084<br/> <math>\chi^2 = 1041.93711952551</math><br/>                 p-value = 1.43716384369925e-225</p> |
| A9 | 253  | <p>Deletion error gap lengths (context=A9)</p> | INVALID/ERROR                                                                                                            | INVALID/ERROR                                                                                                                    |
| T9 | 205  |                                                | INVALID/ERROR                                                                                                            | INVALID/ERROR                                                                                                                    |

|     |    |                                                                                                                                     |               |               |
|-----|----|-------------------------------------------------------------------------------------------------------------------------------------|---------------|---------------|
|     |    | <p>Deletion error gap lengths (context=T9)</p>     |               |               |
| A10 | 43 | <p>Deletion error gap lengths (context=A10)</p>    | INVALID/ERROR | INVALID/ERROR |
| T10 | 24 | <p>Deletion error gap lengths (context=T10)</p>  | INVALID/ERROR | INVALID/ERROR |
|     |    |                                                                                                                                     |               |               |

|                      |  |                                                                                                                        |                                                                                                                            |
|----------------------|--|------------------------------------------------------------------------------------------------------------------------|----------------------------------------------------------------------------------------------------------------------------|
| <p>A11</p> <p>12</p> |  | <p>s = 1.83572058717731<br/> <math>X^2 = 1.49935934270401</math><br/>                 p-value = 0.220769963822161</p>  | <p>beta = 0.294117647058824<br/> <math>X^2 = 3.11746534138453</math><br/>                 p-value = 0.0774571807894458</p> |
| <p>T11</p> <p>3</p>  |  | <p>INVALID/ERROR</p>                                                                                                   | <p>INVALID/ERROR</p>                                                                                                       |
| <p>A12</p> <p>8</p>  |  | <p>s = 0.539275867770467<br/> <math>X^2 = 1.54150279443063</math><br/>                 p-value = 0.214394255775441</p> | <p>beta = 0.428571428571429<br/> <math>X^2 = 2.69665127955944</math><br/>                 p-value = 0.100559258834669</p>  |

|     |    |  |                                                                                                                        |                                                                                                                           |
|-----|----|--|------------------------------------------------------------------------------------------------------------------------|---------------------------------------------------------------------------------------------------------------------------|
|     |    |  |                                                                                                                        |                                                                                                                           |
| T12 | 4  |  | INVALID/ERROR                                                                                                          | INVALID/ERROR                                                                                                             |
| A13 | 7  |  | <p>s = 0.157507175229639<br/> <math>X^2 = 0.399977628058061</math><br/>                 p-value = 0.81873991142764</p> | <p>beta = 0.588235294117647<br/> <math>X^2 = 3.72952008256997</math><br/>                 p-value = 0.154933383040224</p> |
| T13 | 11 |  | <p>s = 1.53701796251543<br/> <math>X^2 = 0.196334998617163</math><br/>                 p-value = 0.657695536506828</p> | <p>beta = 0.3125<br/> <math>X^2 = 0.305959533186983</math><br/>                 p-value = 0.580170226064407</p>           |

|            |          |  |                                                                                                                |                                                                                  |
|------------|----------|--|----------------------------------------------------------------------------------------------------------------|----------------------------------------------------------------------------------|
| <p>A14</p> | <p>5</p> |  | <p>s =<br/>0.0926542887493549<br/>X<sup>2</sup> =<br/>0.395050902693468<br/>p-value =<br/>0.52965630969129</p> | <p>beta = 0.5<br/>X<sup>2</sup> = 3.175<br/>p-value =<br/>0.0747732118999497</p> |
| <p>T14</p> | <p>2</p> |  | <p>INVALID/ERROR</p>                                                                                           | <p>INVALID/ERROR</p>                                                             |
|            |          |  |                                                                                                                |                                                                                  |

| T15        | 4             | <p>Deletion error gap lengths (context=T15)</p>  <table border="1"> <caption>Data for Deletion error gap lengths (context=T15)</caption> <thead> <tr> <th>gap length</th> <th># occurrences</th> </tr> </thead> <tbody> <tr> <td>1</td> <td>2.00</td> </tr> <tr> <td>2</td> <td>2.00</td> </tr> </tbody> </table> | gap length    | # occurrences | 1 | 2.00 | 2             | 2.00          | INVALID/ERROR | INVALID/ERROR |
|------------|---------------|-----------------------------------------------------------------------------------------------------------------------------------------------------------------------------------------------------------------------------------------------------------------------------------------------------------------------------------------------------------------------------------------------------|---------------|---------------|---|------|---------------|---------------|---------------|---------------|
| gap length | # occurrences |                                                                                                                                                                                                                                                                                                                                                                                                     |               |               |   |      |               |               |               |               |
| 1          | 2.00          |                                                                                                                                                                                                                                                                                                                                                                                                     |               |               |   |      |               |               |               |               |
| 2          | 2.00          |                                                                                                                                                                                                                                                                                                                                                                                                     |               |               |   |      |               |               |               |               |
| T16        | 4             | <p>Deletion error gap lengths (context=T16)</p>  <table border="1"> <caption>Data for Deletion error gap lengths (context=T16)</caption> <thead> <tr> <th>gap length</th> <th># occurrences</th> </tr> </thead> <tbody> <tr> <td>1</td> <td>4.0</td> </tr> </tbody> </table>                                     | gap length    | # occurrences | 1 | 4.0  | INVALID/ERROR | INVALID/ERROR |               |               |
| gap length | # occurrences |                                                                                                                                                                                                                                                                                                                                                                                                     |               |               |   |      |               |               |               |               |
| 1          | 4.0           |                                                                                                                                                                                                                                                                                                                                                                                                     |               |               |   |      |               |               |               |               |
| A17        | 3             | <p>Deletion error gap lengths (context=A17)</p>  <table border="1"> <caption>Data for Deletion error gap lengths (context=A17)</caption> <thead> <tr> <th>gap length</th> <th># occurrences</th> </tr> </thead> <tbody> <tr> <td>1</td> <td>1.0</td> </tr> <tr> <td>2</td> <td>2.0</td> </tr> </tbody> </table> | gap length    | # occurrences | 1 | 1.0  | 2             | 2.0           | INVALID/ERROR | INVALID/ERROR |
| gap length | # occurrences |                                                                                                                                                                                                                                                                                                                                                                                                     |               |               |   |      |               |               |               |               |
| 1          | 1.0           |                                                                                                                                                                                                                                                                                                                                                                                                     |               |               |   |      |               |               |               |               |
| 2          | 2.0           |                                                                                                                                                                                                                                                                                                                                                                                                     |               |               |   |      |               |               |               |               |
| T19        | 3             |                                                                                                                                                                                                                                                                                                                                                                                                     | INVALID/ERROR | INVALID/ERROR |   |      |               |               |               |               |

|            |               | <p>Deletion error gap lengths (context=T19)</p>  <table border="1"> <caption>Deletion error gap lengths (context=T19)</caption> <thead> <tr> <th>gap length</th> <th># occurrences</th> </tr> </thead> <tbody> <tr> <td>1</td> <td>~1.95</td> </tr> </tbody> </table>                                                                          | gap length | # occurrences | 1 | ~1.95 |               |               |   |      |               |               |
|------------|---------------|----------------------------------------------------------------------------------------------------------------------------------------------------------------------------------------------------------------------------------------------------------------------------------------------------------------------------------------------------------------------------------------------------------------------------------|------------|---------------|---|-------|---------------|---------------|---|------|---------------|---------------|
| gap length | # occurrences |                                                                                                                                                                                                                                                                                                                                                                                                                                  |            |               |   |       |               |               |   |      |               |               |
| 1          | ~1.95         |                                                                                                                                                                                                                                                                                                                                                                                                                                  |            |               |   |       |               |               |   |      |               |               |
| A20        | 1             | <p>Deletion error gap lengths (context=A20)</p>  <table border="1"> <caption>Deletion error gap lengths (context=A20)</caption> <thead> <tr> <th>gap length</th> <th># occurrences</th> </tr> </thead> <tbody> <tr> <td>1</td> <td>1.00</td> </tr> </tbody> </table>                                                                          | gap length | # occurrences | 1 | 1.00  | INVALID/ERROR | INVALID/ERROR |   |      |               |               |
| gap length | # occurrences |                                                                                                                                                                                                                                                                                                                                                                                                                                  |            |               |   |       |               |               |   |      |               |               |
| 1          | 1.00          |                                                                                                                                                                                                                                                                                                                                                                                                                                  |            |               |   |       |               |               |   |      |               |               |
| T20        | 5             | <p>Deletion error gap lengths (context=T20)</p>  <table border="1"> <caption>Deletion error gap lengths (context=T20)</caption> <thead> <tr> <th>gap length</th> <th># occurrences</th> </tr> </thead> <tbody> <tr> <td>1</td> <td>~1.0</td> </tr> <tr> <td>2</td> <td>~2.0</td> </tr> <tr> <td>3</td> <td>~2.0</td> </tr> </tbody> </table> | gap length | # occurrences | 1 | ~1.0  | 2             | ~2.0          | 3 | ~2.0 | INVALID/ERROR | INVALID/ERROR |
| gap length | # occurrences |                                                                                                                                                                                                                                                                                                                                                                                                                                  |            |               |   |       |               |               |   |      |               |               |
| 1          | ~1.0          |                                                                                                                                                                                                                                                                                                                                                                                                                                  |            |               |   |       |               |               |   |      |               |               |
| 2          | ~2.0          |                                                                                                                                                                                                                                                                                                                                                                                                                                  |            |               |   |       |               |               |   |      |               |               |
| 3          | ~2.0          |                                                                                                                                                                                                                                                                                                                                                                                                                                  |            |               |   |       |               |               |   |      |               |               |

## Chi square statistics



## Average Pearson's residuals



## Mann U Tests

Deletion : Mann-Whitney tests by context



### Mann U Tests by context length

Deletion : Mann-Whitney tests by context length
